# Supplementary material for: Development of prognostic signature based on immune-related genes in muscle-invasive bladder cancer: bioinformatics analysis of TCGA database
Source: Aging (Albany NY). 2021 Jan 19;13(2):1859–71. doi: 10.18632/aging.103787 (PMC7880322; doi:10.18632/aging.103787)
Supplement: Supplementary Table 1 [file aging-13-103787-s002.xlsx]

## Sheet: Supplementary Material S1
Supplementary Table 1. Different expressions of genes.
gene	conMean	treatMean	logFC	pValue	fdr
AC010422.4	0.0984279	0.271768	1.46524	0.000258057	0.000805645
RPUSD3	3.80201	7.6167	1.0024	1.13897e-09	3.97962e-08
EMC6	2.30519	4.61081	1.00013	1.50966e-06	1.00056e-05
ARVCF	1.95467	4.53046	1.21274	0.000157599	0.000526629
CD302	1.98107	0.764853	-1.37303	4.41961e-07	3.61487e-06
PRSS53	0.140191	0.341951	1.28639	7.20716e-06	3.73765e-05
TCF4	3.3797	1.67501	-1.01272	2.80382e-07	2.4687e-06
KBTBD8	1.21151	0.573125	-1.07988	2.14373e-05	9.46641e-05
AC132938.2	0.0996591	0.221122	1.14977	6.36417e-06	3.35707e-05
TSPAN2	14.7531	3.32368	-2.15016	1.95387e-07	1.83394e-06
NAT8	0.0532716	0.29116	2.45037	0.0163025	0.028673
HACD1	4.03383	1.44606	-1.48003	5.0555e-06	2.76872e-05
AL136162.1	0.14546	0.655329	2.1716	3.18543e-09	7.92683e-08
FAM110B	2.33106	0.773427	-1.59165	6.50681e-08	7.56895e-07
AC010201.1	0.183519	0.394539	1.10424	0.00638195	0.0127714
PRSS1	0.0343358	6.54371	7.57425	0.00267146	0.00603328
EFCC1	2.67191	0.936816	-1.51204	1.73707e-06	1.12272e-05
AC069307.1	0.418965	0.8781	1.06756	0.000276592	0.000855822
TLL2	0.0445879	0.289853	2.7006	0.00032904	0.00099529
PITX2	4.36736	1.27804	-1.77283	4.41943e-05	0.000175868
LAMC2	7.30824	53.2168	2.86428	5.57742e-05	0.000214269
CEBPB-AS1	0.798919	0.375891	-1.08773	6.13616e-05	0.000232357
PLK1	2.25373	11.7564	2.38307	6.1671e-10	2.75508e-08
TMEM108	1.55733	0.359936	-2.11326	4.4907e-05	0.000177975
AC013553.3	0.537454	0.22683	-1.24453	2.73147e-06	1.64264e-05
AC108676.1	0.141089	1.24024	3.13595	0.00149599	0.00367304
SRRM3	1.17459	2.45628	1.06431	0.0164452	0.0288698
SPRN	0.811797	1.94474	1.26038	2.34684e-08	3.43477e-07
NAPSB	8.35771	3.64452	-1.19738	0.00284656	0.00636592
AC009087.1	0.078004	0.21276	1.44761	0.00155642	0.00379871
PPP1R14B	30.9419	85.3942	1.46457	8.59104e-10	3.32358e-08
LY6K	1.54324	4.35583	1.49699	0.00125255	0.00315331
C3orf35	0.125151	0.314414	1.32899	0.000194324	0.000632783
NFATC4	8.38622	3.2333	-1.37501	4.89992e-08	6.0485e-07
LGALS17A	0.0494942	0.475896	3.26532	0.010379	0.0194237
LRRC37A15P	0.0939732	0.254981	1.44007	0.00519161	0.0106692
TUBB	155.093	317.438	1.03334	4.50281e-08	5.67403e-07
SOBP	4.55696	0.610189	-2.90074	5.28254e-10	2.53494e-08
BNIP3P27	0.0961608	0.377133	1.97155	0.00467185	0.00973761
PCSK4	0.3738	0.936412	1.32488	0.000990571	0.00258643
AC040904.1	0.0766392	0.250115	1.70644	0.0228595	0.0384089
BLM	0.568765	2.20824	1.95699	2.47413e-10	1.59526e-08
ADAM8	5.18191	15.2709	1.55923	1.17333e-05	5.64494e-05
BORA	0.799604	2.73283	1.77304	6.86251e-10	2.96003e-08
PSMA6P1	0.21631	0.501796	1.214	0.000112797	0.000394046
LINC01615	0.261977	2.19945	3.06963	0.00105861	0.0027339
AP001625.2	0.281977	0.683084	1.27649	0.0103638	0.019397
STC1	26.3976	8.59063	-1.61957	0.000815257	0.00219024
PFKFB4	0.65906	3.77033	2.51621	4.66479e-12	2.64326e-09
AL391280.1	0.127254	0.290947	1.19304	0.00091671	0.0024212
AL391069.2	0.547148	1.53085	1.48433	5.24361e-09	1.14803e-07
AL162595.1	0.224309	0.509195	1.18273	0.000217167	0.000695462
MYLPF	0.286521	1.15433	2.01035	0.00192243	0.00454527
MXRA7	23.317	5.84512	-1.99608	2.5373e-07	2.2746e-06
AL590556.1	0.632592	0.307488	-1.04075	5.18934e-06	2.83375e-05
C8orf88	7.8607	1.55848	-2.33452	7.39961e-07	5.50275e-06
IGF2BP1	0.0377289	1.05058	4.79937	2.52502e-06	1.53572e-05
AL121832.2	1.43679	4.11133	1.51676	4.05013e-08	5.22286e-07
NFATC1	3.53672	1.33791	-1.40243	6.78422e-07	5.11009e-06
FANCF	2.108	4.39868	1.0612	6.52677e-07	4.95596e-06
SARS2	1.58563	3.42167	1.10965	1.12725e-07	1.17962e-06
RCOR2	1.00623	3.48287	1.79132	0.00510863	0.0105194
GABRA3	0.645619	1.94094	1.588	0.00384695	0.0082539
HMGA2	0.0199754	1.36561	6.09517	0.000246873	0.000776543
AHSA2P	2.96544	6.35923	1.1006	5.40214e-05	0.000208346
SLC16A8	0.318206	0.663187	1.05946	0.0284004	0.0463572
LINC02195	0.348063	1.40085	2.00888	0.00397564	0.00849407
AC097639.1	0.245515	0.760518	1.63117	0.000848975	0.00226558
AC046143.2	0.981036	2.13178	1.11968	2.07266e-06	1.29978e-05
AC016582.3	1.05269	0.49079	-1.1009	3.44496e-05	0.000141688
CHIT1	0.0712556	0.917104	3.68601	0.00254794	0.00578642
DUSP1	795.229	103.543	-2.94115	2.14111e-11	4.46375e-09
MEST	2.72677	16.7919	2.6225	2.40279e-06	1.47525e-05
CHRNA5	0.649254	1.62893	1.32707	4.6874e-07	3.7942e-06
LINC02384	0.604416	0.196955	-1.61767	0.000345839	0.00103941
NAP1L3	2.21085	0.665997	-1.73101	3.103e-08	4.24356e-07
MAP3K20	24.7598	3.73666	-2.72818	9.40502e-07	6.67674e-06
RAB19	0.377373	0.776889	1.04172	0.00191006	0.00451885
PROCA1	0.368994	1.01083	1.45386	2.89115e-05	0.000122177
ZNF692	4.44011	11.1648	1.3303	4.87455e-07	3.91361e-06
AC022098.3	0.0975121	0.272914	1.48479	0.000203129	0.000657501
AC009237.15	0.446087	1.00869	1.17709	0.0263619	0.0434607
C19orf73	0.680053	1.94242	1.51414	1.87651e-07	1.78093e-06
AL365181.3	1.36428	3.25062	1.25258	0.0201315	0.0343919
SNORA5A	0.354527	1.03706	1.54854	0.0170991	0.0298448
AC073410.1	0.127473	0.395571	1.63375	1.38661e-05	6.51891e-05
FAM71E1	0.791716	1.80345	1.18771	0.000361201	0.00107849
RF01241	0.105829	0.354958	1.74591	0.00135359	0.0033706
RUSC1-AS1	0.688619	2.01574	1.54953	1.44119e-07	1.44065e-06
AL139286.2	0.307303	0.638752	1.05559	0.00362766	0.00784531
SLC22A11	0.00633143	0.236411	5.22262	0.00743014	0.0145798
AC004923.4	0.246274	0.595976	1.27499	0.000164869	0.000547709
PRKAR2B	8.38016	2.62974	-1.67205	1.90024e-09	5.56226e-08
LY6E	52.7694	160.2	1.6021	0.000293136	0.000898857
AL391095.1	0.0855725	0.301553	1.81719	0.000303933	0.000927595
SLC38A7	1.85029	4.7268	1.35312	2.08689e-11	4.44958e-09
TSTA3	15.2163	34.6605	1.18767	3.80004e-08	4.96866e-07
SLMAP	21.4879	4.44348	-2.27376	1.17046e-06	8.03267e-06
SERPINB11	1.85946	0.340117	-2.45078	0.00735859	0.0144545
LLGL2	7.62813	16.3255	1.09773	9.74334e-05	0.000347622
RTL10	2.26238	5.29941	1.22799	6.15817e-07	4.71616e-06
RADIL	0.517981	0.225356	-1.2007	7.47137e-07	5.54312e-06
2020-09-03	0.32517	1.78769	2.45883	1.90608e-05	8.55798e-05
AL080317.2	0.112148	0.400226	1.83542	3.37059e-06	1.95494e-05
TFDP1	15.9227	33.4385	1.07043	2.16102e-07	1.98859e-06
GPRASP2	4.62792	2.02685	-1.19112	1.82043e-07	1.73914e-06
RCAN1	35.2885	7.12892	-2.30744	5.18493e-09	1.1405e-07
AL590326.1	0.507929	1.26926	1.32128	0.000111934	0.000391616
IFI44	8.83372	26.1312	1.56468	0.00436198	0.00917428
FGF8	0.0246075	0.782695	4.99128	0.0127493	0.0232181
MRGPRF	33.1131	4.70787	-2.81426	4.59284e-11	5.9367e-09
UHMK1	7.9266	16.811	1.08464	3.88909e-07	3.25909e-06
LINC00592	0.12597	0.315501	1.32457	0.0195687	0.0335681
NRXN2	0.912623	0.273907	-1.73633	3.52718e-08	4.68368e-07
LRWD1	2.36296	5.02343	1.08808	3.73199e-10	2.02966e-08
PFN1P6	0.151211	0.43308	1.51807	0.0138041	0.0248327
ZNF114	0.0806429	1.43277	4.15112	1.02751e-07	1.09979e-06
MYLK2	0.0605175	0.209276	1.78999	5.36278e-09	1.17002e-07
AC092119.2	0.190029	0.571601	1.58879	7.79993e-06	3.98774e-05
EEF1A1P12	2.30634	0.988158	-1.22279	9.87092e-06	4.87518e-05
KCNC3	0.403797	1.64992	2.0307	4.79022e-05	0.000188267
AHCY	28.8212	58.0666	1.01058	1.48961e-09	4.73721e-08
MAMDC2	11.6171	1.20161	-3.27321	1.09964e-09	3.9003e-08
ULBP1	0.0423714	0.415128	3.29239	4.04997e-08	5.22286e-07
MAP6	1.21265	0.534195	-1.18272	1.02477e-06	7.15849e-06
ASB5	10.6306	0.408159	-4.70295	2.44974e-08	3.54738e-07
TMEM191A	0.457566	1.41003	1.62367	7.54367e-07	5.5769e-06
GSN	168.768	36.7978	-2.19735	3.70442e-11	5.36014e-09
PID1	8.1046	1.09691	-2.8853	1.49322e-11	3.88788e-09
SMPD5	0.0844716	0.217488	1.3644	3.37949e-05	0.000139397
GNGT1	0.177658	0.558521	1.6525	0.00022029	0.000704482
HSPB6	243.596	11.4919	-4.4058	4.42429e-12	2.64326e-09
LBP	0.0819913	1.86675	4.50891	0.0127339	0.0232013
TMPRSS6	0.0785883	0.275942	1.81198	0.00317679	0.00700014
AC127024.4	0.432238	1.0507	1.28146	0.000582935	0.00163201
SMYD2	4.65676	10.7766	1.2105	2.36541e-09	6.47915e-08
AC010168.1	0.221066	0.611719	1.46839	0.00756197	0.0148063
SOHLH1	0.00744351	0.395023	5.72981	0.00544118	0.0111185
DISP1	3.12824	1.18012	-1.40642	2.09054e-05	9.26645e-05
AP000580.1	0.54723	1.36554	1.31925	1.06711e-05	5.20192e-05
DNAAF3	0.0800222	0.381833	2.25447	0.000124585	0.00042935
AL354877.1	0.20749	0.751173	1.85611	1.66406e-05	7.63179e-05
CCDC60	1.84497	0.541147	-1.76951	6.68931e-08	7.7572e-07
PPOX	2.80531	5.92272	1.0781	6.71664e-06	3.51532e-05
AP003108.5	0.0465751	0.23454	2.3322	0.0048684	0.0101035
AC245041.1	2.47806	4.99919	1.01249	0.0195748	0.0335755
KCNS1	0.111503	0.660695	2.5669	0.000448531	0.00130054
LINC02416	0.0904571	0.339493	1.90807	3.45191e-05	0.000141942
WNT2B	1.09593	0.362137	-1.59755	5.21987e-10	2.52424e-08
AL390719.2	3.16606	8.51771	1.42778	0.00190407	0.00450746
MATN3	0.312134	1.54952	2.31159	4.31614e-08	5.50535e-07
AL022341.1	0.198811	0.445872	1.16523	0.000624057	0.00173401
LAGE3P1	0.0885635	0.344913	1.96145	1.7483e-06	1.12959e-05
AL031123.3	0.0736959	0.230403	1.6445	0.000188487	0.000616883
AC126773.2	0.122303	0.387115	1.6623	2.65051e-05	0.000113698
CCNYL2	0.0167029	0.61109	5.19321	0.000257148	0.00080294
DSG2-AS1	0.113629	0.248726	1.13023	0.00109427	0.00281015
C6orf223	0.0568051	0.902443	3.98974	5.62561e-06	3.02647e-05
AC006058.3	0.0371861	0.306054	3.04095	0.00447979	0.0093842
AC116407.4	0.184633	0.450656	1.28736	6.04029e-06	3.20969e-05
LINC00491	0.231238	0.769637	1.7348	0.0061176	0.0122948
AL021154.1	0.232854	0.571128	1.29439	0.015271	0.027113
AL110115.1	0.0623528	0.224214	1.84635	6.20121e-05	0.000234536
SPDYA	0.0971239	0.278075	1.51757	1.57948e-07	1.54756e-06
TMOD1	8.76167	0.933889	-3.22988	1.24632e-10	1.06779e-08
AC055855.1	0.210604	0.505678	1.26368	0.00116509	0.00296053
AC064807.4	0.34922	0.713373	1.03052	0.000563059	0.00158562
FAM13B	8.13667	3.73535	-1.1232	0.000145045	0.000490268
AL035461.2	1.2911	3.51437	1.44467	1.89014e-08	2.90694e-07
PDZRN4	7.2105	0.327716	-4.45958	1.58002e-09	4.91639e-08
AL596094.1	0.618945	1.39929	1.17682	2.12865e-07	1.96845e-06
ITGA5	91.9836	20.5118	-2.16492	7.14403e-06	3.71003e-05
ZNF205	3.95634	8.10051	1.03385	1.62311e-08	2.59186e-07
AC061975.1	0.019441	0.33846	4.12181	0.000392571	0.0011607
TOPBP1	3.8013	8.52287	1.16485	6.4895e-09	1.33543e-07
RNFT2	0.193045	0.945831	2.29264	4.31614e-08	5.50535e-07
AC010997.4	0.0398868	0.301963	2.92039	2.19173e-07	2.01289e-06
EDNRB	8.40131	2.4928	-1.75284	6.93962e-09	1.40009e-07
TRABD2B	1.30624	0.559421	-1.22342	2.03432e-07	1.89712e-06
PCP2	0.478811	1.96694	2.03843	0.000114539	0.000399246
RF00275	0.0747932	0.298843	1.99841	2.04656e-05	9.10159e-05
AC008870.2	0.338099	1.01823	1.59054	2.11796e-07	1.95953e-06
LINC00525	0.123041	0.719228	2.54731	1.28443e-05	6.09658e-05
LINC00941	0.25544	0.979737	1.93941	0.0297124	0.048189
AC037487.3	0.436566	1.15627	1.4052	0.0122392	0.0224066
GJC2	2.35258	0.714958	-1.71831	1.73223e-09	5.19198e-08
STMN1P1	0.129242	0.305065	1.23904	0.000577567	0.00162035
MEP1A	0.0187436	0.346553	4.2086	0.0303626	0.0491157
PGM5	59.1299	2.67253	-4.46761	1.63442e-11	3.98263e-09
LINC01224	0.226898	0.989483	2.12463	0.00206711	0.00483364
GUCY1B2	0.073732	0.400152	2.44019	1.88901e-05	8.49641e-05
MYCL	13.6269	28.9105	1.08513	0.00874176	0.0167677
AL031186.1	0.433299	1.13618	1.39076	2.25398e-05	9.88814e-05
GAREM2	0.825106	1.89598	1.20029	0.000434527	0.00126502
RNU6-1095P	0.239126	0.59062	1.30446	0.00682563	0.0135394
AC127024.6	0.240526	0.530821	1.14203	0.00181567	0.00433217
MYADM	110.1	24.1653	-2.18781	3.15241e-10	1.80883e-08
AC015660.1	0.0353266	0.239027	2.75835	0.0209771	0.0356484
CACNB3	2.79052	7.29453	1.38628	5.55992e-08	6.67867e-07
C20orf96	3.35025	7.17092	1.09789	3.94581e-05	0.000159456
CTB-178M22.2	0.0879181	0.340298	1.95257	0.00185192	0.00440233
PRR9	0.188915	6.63368	5.134	0.00126578	0.00318107
NACAD	1.99473	0.77673	-1.36071	1.4552e-08	2.40775e-07
PDXDC2P-NPIPB14P	0.576446	1.37055	1.2495	4.82888e-05	0.00018943
AC105052.2	0.301309	0.621556	1.04464	6.82796e-05	0.00025546
PANO1	0.164624	0.499631	1.60168	4.09333e-08	5.2641e-07
SIX3	0.291408	1.1293	1.95431	0.0282875	0.0462132
HIST4H4	0.265825	0.853777	1.68338	0.00020621	0.000666285
AL133517.1	0.21613	0.625451	1.533	9.26707e-08	1.00799e-06
MRPS26	30.3292	68.028	1.16542	2.23322e-09	6.24471e-08
ABCC4	7.87284	3.47646	-1.17927	7.71317e-05	0.000284271
ARNTL2	2.93134	7.3122	1.31874	0.000425407	0.00124193
CGREF1	0.38071	2.41239	2.6637	0.000866315	0.00230432
LTBP4	51.4524	10.1258	-2.3452	3.22165e-11	5.03732e-09
KRT8P3	1.01417	2.63677	1.37847	0.00185068	0.00439993
ERVMER34-1	0.462588	2.28431	2.30396	5.88168e-06	3.14231e-05
AL355353.1	2.63414	5.82339	1.14453	0.000195773	0.000637282
SNX10	1.34649	4.90974	1.86644	8.38467e-07	6.07654e-06
TMEM191B	0.0409374	0.313245	2.9358	4.78357e-06	2.64294e-05
AC024060.1	2.6028	5.84632	1.16746	3.04941e-06	1.80038e-05
C12orf56	0.207536	0.522137	1.33107	0.00904791	0.0172632
TRAF2	4.79767	10.3402	1.10785	5.54684e-09	1.19765e-07
CKAP2L	0.695871	3.75425	2.43163	9.00568e-10	3.39304e-08
PELI2	5.28355	1.29993	-2.02308	3.04017e-10	1.76057e-08
AC005828.1	0.00686905	0.231926	5.07741	0.00164964	0.0039953
CCDC7	0.144723	0.296327	1.03389	5.42941e-06	2.93918e-05
PPP1R12B	35.8955	3.02045	-3.57097	2.27224e-10	1.52495e-08
PARP14	5.21513	12.5697	1.26918	1.05444e-06	7.32755e-06
FCGR1A	0.364377	1.34762	1.88691	0.00325477	0.0071451
AC084880.1	10.6347	1.60261	-2.73028	1.47236e-09	4.73054e-08
CDCP1	6.09686	14.9955	1.29839	8.605e-05	0.000312293
PDE3B	2.42288	1.19589	-1.01864	0.000103645	0.00036713
ZNF736P9Y	0.0180835	0.789316	5.44786	0.00102921	0.0026754
SERPINF1	69.748	33.7795	-1.046	7.27084e-06	3.76235e-05
AC098820.1	0.0951032	0.212562	1.16032	0.000751505	0.00203797
ROR2	6.41915	2.30376	-1.47839	6.71664e-06	3.51532e-05
HAVCR1	0.0166263	3.00274	7.49667	0.000870274	0.00231452
PARD3B	2.9555	0.708044	-2.06149	2.6705e-08	3.76175e-07
TOP2A	6.17221	30.154	2.28849	3.14932e-09	7.8578e-08
SEMA3G	4.67634	1.56342	-1.58067	2.56334e-09	6.79322e-08
AC107214.1	0.175339	0.429224	1.29158	8.96613e-07	6.43578e-06
FLNC	150.662	6.01582	-4.64641	6.1671e-10	2.75508e-08
KANK1	14.0295	5.13716	-1.44942	1.59561e-07	1.55686e-06
DLG1-AS1	0.0812126	0.220266	1.43947	7.50296e-05	0.000277669
HIST1H1B	0.0480491	3.7535	6.28758	1.71707e-07	1.65813e-06
CYGB	25.8412	7.28572	-1.82653	2.18287e-07	2.00574e-06
AC108860.1	0.100178	0.468961	2.22691	0.00279078	0.00626655
POC1A	3.27585	9.21937	1.4928	2.17598e-08	3.24031e-07
DLGAP5	1.64829	7.74323	2.23196	5.80165e-09	1.2342e-07
SLC1A6	0.0636934	5.4061	6.4073	3.07048e-05	0.000128539
MGLL	14.012	4.18344	-1.74391	2.30006e-10	1.52495e-08
BX276092.7	0.00215874	0.360257	7.38269	7.24855e-05	0.00026905
AL513218.1	0.196873	0.848787	2.10813	3.69297e-09	8.79428e-08
PLOD1	17.5966	38.2413	1.11984	1.50114e-07	1.48711e-06
HIST1H3H	0.780183	6.70211	3.10273	8.61918e-08	9.52424e-07
AC026691.1	0.782797	0.318535	-1.29718	3.97798e-05	0.000160548
AC003965.2	0.224886	0.812074	1.85242	0.00266654	0.00602363
SNORA69	0.148038	0.415818	1.48998	0.000604947	0.00168682
ZNF772	0.625417	1.2636	1.01465	0.000129438	0.000443506
C5orf46	0.0911527	1.40263	3.94371	2.51128e-08	3.6079e-07
EVA1C	8.94788	3.04754	-1.5539	7.01754e-09	1.40673e-07
DSEL	0.781529	0.366734	-1.09156	2.56259e-06	1.55353e-05
CST2	0.0238901	1.89687	6.31107	5.05807e-09	1.12048e-07
CHAC2	1.41771	2.88474	1.02488	2.77423e-05	0.000117927
LINC01297	0.120079	0.643987	2.42304	0.0010405	0.00269691
HIST1H3F	0.0501706	2.47957	5.6271	3.35741e-06	1.95273e-05
CSGALNACT1	6.68682	1.79013	-1.90126	6.05705e-11	7.0589e-09
AC136632.2	0.218998	0.442185	1.01373	2.61806e-05	0.000112461
AC012676.5	0.296811	0.676851	1.1893	0.00245498	0.00560784
CLEC3A	4.82395	0.446268	-3.43423	8.57914e-10	3.32358e-08
PARD3-AS1	0.542076	1.1296	1.05925	0.00579958	0.0117277
AL137803.1	0.147406	0.573613	1.96028	0.00146791	0.00361482
ICAM5	0.14631	0.589012	2.00927	0.00313845	0.00692785
TPX2	5.62877	34.0012	2.59469	2.59725e-10	1.62984e-08
SSC5D	7.52847	1.98347	-1.92433	5.16884e-07	4.10423e-06
FASTKD3	1.63596	3.67071	1.16593	1.37303e-09	4.54361e-08
AC092964.1	0.0462584	0.280115	2.59823	4.29518e-06	2.41289e-05
AL031667.3	0.292675	0.593951	1.02105	0.00179274	0.00428718
AC093249.6	0.55969	1.20215	1.10292	8.47188e-05	0.000308058
AC007879.3	0.0727455	0.295979	2.02457	0.0193231	0.0332257
AC023818.1	0.153049	0.319767	1.06303	0.00237988	0.0054649
HHIP	1.51002	0.231976	-2.70252	2.33694e-06	1.44115e-05
KIF20A	2.2715	10.7619	2.24421	3.07827e-09	7.74229e-08
CLIP3	28.2417	4.75909	-2.56907	7.75814e-09	1.51159e-07
CCSAP	1.15584	3.05507	1.40226	7.54445e-10	3.13861e-08
RNU6-689P	0.0629364	0.319251	2.34272	0.000499934	0.00143057
POLQ	0.277228	1.65771	2.58004	1.1573e-10	1.02912e-08
TRIM46	0.311322	0.717909	1.2054	0.00215347	0.00500254
AC004471.1	0.165154	0.50283	1.60626	5.62613e-06	3.02647e-05
ROS1	0.0045274	0.396776	6.4535	0.000699525	0.00191622
AC093249.2	0.0943045	0.393795	2.06205	7.67155e-07	5.65853e-06
LINC02585	0.508429	1.2449	1.29191	2.31111e-05	0.00010101
EEF1A1P11	4.56891	1.95923	-1.22156	2.05354e-06	1.28994e-05
CATSPER1	0.116082	1.38799	3.57979	6.98369e-07	5.23513e-06
KCP	0.310091	1.01086	1.70483	0.000244299	0.00076935
C2orf48	0.0740308	0.414236	2.48425	7.83875e-07	5.75264e-06
TBX4	4.22715	0.667169	-2.66356	0.000566937	0.00159403
MIR589	0.391566	0.882597	1.1725	0.00377526	0.00812423
AC233992.3	0.194123	0.438255	1.1748	0.000283619	0.000873961
TMEM92	0.873526	2.10252	1.2672	0.0187665	0.0323398
AP003555.2	0.174272	0.515743	1.56531	0.00472171	0.00982456
AL589765.6	0.0330479	0.272633	3.04433	1.44679e-07	1.44548e-06
NUDT5	7.06933	15.8109	1.16127	1.39287e-08	2.32306e-07
LINC02542	0.576531	1.42833	1.30886	0.0133997	0.0242237
GGH	5.91497	19.2	1.69867	3.52337e-07	3.00086e-06
KLHDC7A	2.92027	7.08147	1.27795	0.0305639	0.0493927
DUSP12	6.03017	12.4994	1.05159	4.47785e-09	1.02211e-07
LINC01767	0.218295	0.881903	2.01434	0.0163579	0.0287412
AL138962.1	0.100901	0.283372	1.48975	1.13959e-05	5.50517e-05
HIST1H4D	0.139078	3.93793	4.82347	1.05746e-07	1.12606e-06
AC253536.6	0.429025	1.01159	1.2375	0.00128159	0.0032139
ACOT4	0.778326	2.60502	1.74285	5.588e-07	4.37777e-06
AC103691.1	1.23614	3.10152	1.32713	0.000466261	0.00134447
AC112484.3	0.258305	1.05728	2.03321	3.22074e-06	1.88259e-05
AL121658.1	0.194048	0.455385	1.23067	1.6097e-05	7.40993e-05
BRICD5	1.0087	2.54915	1.33752	2.91333e-06	1.73477e-05
C1orf220	0.191171	0.422897	1.14544	0.00288163	0.00643363
AC087741.2	0.826145	2.31945	1.48932	9.67802e-07	6.84995e-06
RPSAP69	0.0693147	0.287727	2.05347	5.62452e-06	3.02647e-05
RN7SL23P	0.161902	0.336645	1.0561	0.017346	0.0302053
EPB41L4B	1.38615	2.79953	1.0141	0.00271011	0.00610882
SPNS1	0.412271	0.87695	1.0889	1.58809e-08	2.56211e-07
CORT	0.152433	0.367285	1.26873	3.91389e-05	0.000158439
BAG3	66.3299	30.5857	-1.1168	0.000110228	0.000386944
ST6GALNAC5	2.15377	1.00234	-1.10349	0.000983984	0.00257317
SNHG4	0.653956	1.62306	1.31145	9.89524e-05	0.000352505
MOCOS	2.05034	4.33519	1.08023	2.82045e-05	0.000119485
AC100797.1	0.0920911	0.245797	1.41633	0.0186356	0.0321674
RMI1	1.86058	4.56521	1.29493	3.85093e-07	3.23578e-06
JPT1	25.3791	71.6817	1.49796	1.1557e-08	2.01528e-07
STIL	0.483352	2.51331	2.37844	7.49258e-11	7.68214e-09
LINC00958	1.93528	5.51259	1.51019	0.00186135	0.00442404
2020-09-01	4.90838	2.37879	-1.04502	0.0188613	0.0324941
AC129926.1	0.362855	2.13983	2.56003	0.00426843	0.00900883
SGK1	29.4807	10.3241	-1.51376	2.40942e-05	0.000104866
TMEM147	32.5661	65.4382	1.00676	2.07574e-07	1.92903e-06
HSD17B1	0.436893	2.43629	2.47934	9.55901e-08	1.03256e-06
PRAC2	2.22566	0.949963	-1.22829	2.04516e-05	9.09754e-05
AC005180.1	23.459	0.847017	-4.79161	7.95213e-10	3.20184e-08
NFIX	23.6446	6.33493	-1.90011	5.30294e-09	1.15831e-07
PDK4	62.7058	6.32389	-3.30972	8.99837e-12	3.18559e-09
KRT34	0.0597748	0.975867	4.02907	0.00248571	0.00566563
SLC16A4	2.99605	1.23742	-1.27573	1.5165e-07	1.49995e-06
AC004034.1	0.106006	0.419483	1.98446	7.92547e-06	4.04421e-05
AKR1B1	21.3937	63.2044	1.56284	0.00067835	0.0018638
AC147067.2	1.00936	0.47029	-1.10182	0.00718675	0.0141451
CABP1	0.63642	0.244085	-1.3826	3.96504e-08	5.15209e-07
CCDC69	41.1026	7.2403	-2.50511	6.28916e-11	7.23948e-09
RUSC2	11.5009	3.97593	-1.53238	1.02192e-05	5.02076e-05
AC008763.1	0.286865	0.830906	1.53431	0.000407588	0.00119864
CADM3	5.87995	1.09264	-2.42799	1.15428e-11	3.59596e-09
GOLGA8B	1.33489	3.07748	1.20503	0.00064209	0.00177614
MIR1302-3	0.0272307	0.226537	3.05645	0.000223239	0.000713203
FBN1	11.8966	4.52533	-1.39445	0.000721412	0.00196685
ST6GALNAC3	0.614902	0.259575	-1.24421	6.34587e-09	1.31421e-07
GLI1	1.16588	0.420307	-1.4719	3.04941e-06	1.80038e-05
FAM129A	64.6786	6.15274	-3.39399	3.65725e-06	2.09147e-05
SPARCL1	255.439	35.4282	-2.85001	1.43643e-11	3.85025e-09
CHTF18	1.704	6.17466	1.85743	1.78003e-10	1.33595e-08
ZNF682	0.703357	1.86988	1.41062	0.000242514	0.000764756
UBE2S	7.12969	20.1363	1.49789	6.13621e-09	1.28497e-07
ATAD5	0.454413	1.67818	1.88483	2.89656e-10	1.71988e-08
SLC26A6	1.03236	4.06155	1.97608	4.04776e-11	5.58443e-09
AC105219.1	0.351968	1.7178	2.28705	0.000115828	0.000403207
AC023157.1	0.495978	1.68624	1.76546	0.0167102	0.0292721
BOLA2B	0.335038	0.923871	1.46337	8.43278e-09	1.60797e-07
TBX19	0.511285	1.10725	1.11478	3.04941e-06	1.80038e-05
AC098934.1	0.722855	4.04859	2.48564	1.1816e-06	8.08544e-06
AC037198.2	0.946902	0.449364	-1.07533	2.42824e-05	0.000105571
LRGUK	0.0592121	0.243368	2.03918	1.78175e-05	8.08305e-05
COASY	12.8249	26.6234	1.05374	1.77282e-09	5.2883e-08
PCDHGB7	0.976072	0.333191	-1.55064	4.12581e-07	3.42081e-06
PODXL2	5.64093	25.7098	2.18832	5.98697e-06	3.18858e-05
LINC01424	0.0564677	0.26313	2.22028	4.40791e-08	5.59277e-07
AL138966.2	0.167355	0.466029	1.47751	5.7121e-05	0.000218649
HOXB5	1.25984	4.70144	1.89986	1.75193e-05	7.97658e-05
CD79B	11.0467	4.21469	-1.39012	7.89658e-05	0.000289722
AL023284.4	3.58864	8.652	1.2696	0.00183895	0.00437649
AL355802.2	0.291372	0.743375	1.35123	9.18304e-07	6.56636e-06
BCL2L1	22.8266	46.4352	1.02451	5.32234e-07	4.19946e-06
FANCD2	1.12827	4.02331	1.83427	2.6935e-10	1.65157e-08
AC112777.1	0.135379	0.705955	2.38257	1.55374e-08	2.51979e-07
CYP2B7P	1.32297	0.38521	-1.78007	8.66404e-07	6.24763e-06
CLEC7A	1.24302	3.11338	1.32463	0.0290156	0.0472054
HEPHL1	0.0980158	1.39598	3.83212	0.0270657	0.044465
TMEM233	0.560448	0.254194	-1.14065	1.78634e-06	1.14863e-05
KCNN2	1.06753	0.276965	-1.94651	0.000374335	0.00111327
APOA2	0.141653	46.3714	8.35473	0.00829548	0.0160313
RPRM	3.16147	1.5474	-1.03075	7.35036e-05	0.000272559
IL34	4.66598	2.16429	-1.10829	5.28619e-06	2.87576e-05
PRC1	3.21698	11.1996	1.79966	1.1557e-08	2.01528e-07
ZDBF2	1.01135	0.496802	-1.02554	4.70633e-06	2.60563e-05
ITPKA	0.308274	1.22388	1.98918	0.0193413	0.0332356
AKAP12	25.1071	4.97684	-2.33479	3.33401e-09	8.16659e-08
AC144548.1	0.125665	0.253435	1.01204	0.00613808	0.0123333
TSC22D3	51.0951	21.3942	-1.25597	1.6409e-08	2.61138e-07
CHAC1	0.605152	3.10727	2.36028	3.69338e-09	8.79428e-08
UNG	12.923	27.5577	1.09251	1.33314e-08	2.25959e-07
MUC1	20.6476	62.7723	1.60415	0.0276637	0.0453006
SEC61A2	1.21073	2.54898	1.07405	6.5752e-08	7.6296e-07
SGO2	0.722476	2.1192	1.5525	3.60314e-08	4.76768e-07
ALB	0.0185689	2.999	7.33544	0.0280658	0.0458909
BNIP3P11	0.78953	2.60855	1.72418	4.38033e-06	2.45045e-05
CEP126	1.32785	0.531835	-1.32004	1.23545e-05	5.89993e-05
SLC25A15	1.40619	2.81914	1.00346	3.02172e-06	1.7891e-05
TENT5A	11.6553	4.61367	-1.337	1.47087e-07	1.4633e-06
CDRT15P1	0.231263	0.650457	1.49192	0.000168589	0.0005582
FYN	9.53601	4.18648	-1.18765	2.44984e-05	0.00010633
CYCSP6	0.0256144	1.21697	5.5702	6.19912e-05	0.000234504
CXCL10	7.5084	56.0902	2.90117	0.00173648	0.00417604
MKX	2.16021	0.312596	-2.7888	2.95585e-06	1.75786e-05
AF111167.2	0.48735	0.190285	-1.3568	3.80004e-08	4.96866e-07
BAX	18.0404	36.1527	1.00287	8.67023e-09	1.63662e-07
ZNF117	1.30539	5.25916	2.01036	0.000175058	0.00057655
KCNG1	1.08523	8.7977	3.01913	0.0012403	0.00312541
AP003352.1	1.51617	3.18902	1.07268	1.5961e-05	7.35815e-05
AL163051.1	0.300082	0.812058	1.43623	4.6973e-08	5.86397e-07
CCNO	2.65059	6.12297	1.20792	0.000371673	0.00110606
ALKBH6	0.471378	1.2856	1.44749	1.22179e-09	4.16808e-08
OXLD1	8.44946	20.4998	1.27868	1.71398e-08	2.69116e-07
ZNF497	0.226637	0.56804	1.32561	8.71233e-07	6.2704e-06
AL138831.1	0.105805	0.241066	1.18802	0.00924768	0.0175907
AC066613.1	0.242786	0.500501	1.04369	0.00672602	0.0133632
N4BP2L2-IT2	0.232366	0.566061	1.28456	3.97798e-05	0.000160548
CXorf36	3.77099	1.71207	-1.1392	2.94702e-07	2.58388e-06
DDX55	2.36533	4.85145	1.03637	7.72501e-10	3.14413e-08
FAM180A	1.88175	0.346593	-2.44076	3.08918e-10	1.78345e-08
AL645608.8	0.136433	0.629392	2.20577	0.000717171	0.00195785
FLAD1	7.20337	16.628	1.20687	2.86171e-10	1.71547e-08
AF274858.1	0.999047	2.25531	1.1747	9.22885e-05	0.000331599
UNC13D	3.75234	12.9091	1.78252	3.43536e-05	0.000141324
BNIP3P10	0.0436633	0.216089	2.30713	5.20857e-05	0.000202169
PARPBP	0.657075	2.26089	1.78276	3.33401e-09	8.16659e-08
CSF2	0.216354	1.5632	2.85304	0.00137411	0.0034167
AC234772.2	0.837854	0.359513	-1.22065	1.74688e-05	7.96325e-05
ARHGAP11A	1.43391	4.48664	1.64568	1.27589e-08	2.17238e-07
AC121338.2	0.161639	0.374601	1.21258	0.0016286	0.00394997
AC005670.1	0.0318747	0.21482	2.75264	5.26264e-07	4.16637e-06
CDK5	3.26243	7.49019	1.19906	1.1126e-09	3.93141e-08
CCDC114	0.0727377	0.329995	2.18167	1.88216e-05	8.46882e-05
NDC80	1.74415	7.54864	2.11369	4.27983e-09	9.86517e-08
AC079160.1	0.0485704	0.290948	2.58261	0.000502654	0.00143792
HMGA1P4	0.834418	1.70213	1.0285	0.0276624	0.0453006
AC005726.3	0.988431	2.49579	1.33628	7.83499e-05	0.000287799
JUNB	607.743	205.74	-1.56264	1.01506e-06	7.10123e-06
C2CD4B	6.84374	1.34846	-2.34347	1.54768e-07	1.52276e-06
RNU6-1223P	0.244008	0.757882	1.63505	0.00213168	0.00496115
LILRA4	0.504055	0.243002	-1.05262	0.0163433	0.0287394
AC005519.1	0.19357	0.479257	1.30795	0.000135993	0.000463513
ZNF850	0.274824	0.623977	1.18298	0.000860499	0.0022921
CDON	1.77519	0.467106	-1.92615	2.16102e-07	1.98859e-06
SNORD88A	0.238488	0.76787	1.68695	0.000817981	0.00219725
ZNF93	0.797816	2.15901	1.43624	6.31378e-06	3.33236e-05
AC010331.1	0.241685	1.01314	2.06763	2.58568e-08	3.68665e-07
TMEM56	3.17813	1.56755	-1.01967	8.47188e-05	0.000308058
ENPP2	7.86669	3.87913	-1.02002	5.57633e-06	3.00744e-05
POU6F1	2.0133	0.906778	-1.15074	1.03816e-07	1.10802e-06
AC067930.5	0.101309	0.541707	2.41875	1.37326e-06	9.22537e-06
KNOP1	1.32011	3.19261	1.27408	3.73199e-10	2.02966e-08
AC021016.3	0.127695	0.393471	1.62356	0.000113909	0.000397557
WISP2	7.17026	1.53647	-2.2224	5.75346e-07	4.46638e-06
RSRP1	3.7639	9.25456	1.29794	9.6782e-07	6.84995e-06
HSD3B1	0.0226454	1.9395	6.42032	7.2327e-05	0.000268621
AC093627.6	0.904024	0.198456	-2.18754	4.03739e-07	3.36454e-06
RAB3IP	0.955683	3.34918	1.8092	2.10651e-08	3.16449e-07
TCEAL5	1.07642	0.408371	-1.39829	8.12779e-10	3.24472e-08
GPR146	0.55471	0.212452	-1.3846	7.18883e-07	5.36105e-06
COL7A1	4.34354	23.7036	2.44817	3.37059e-06	1.95494e-05
HSF2BP	0.182753	0.632524	1.79122	1.87651e-07	1.78093e-06
CXCL12	22.2139	6.44619	-1.78494	2.06019e-09	5.87466e-08
HIST1H3E	0.554463	1.95845	1.82055	0.000116307	0.000404512
COL14A1	30.0335	4.66249	-2.6874	4.42219e-11	5.91744e-09
AURKA	2.13532	12.3557	2.53265	5.01648e-11	6.31236e-09
CREB5	1.39173	0.386616	-1.8479	4.09035e-09	9.54567e-08
KRT31	0.256853	4.0057	3.96304	0.00844404	0.0162882
AC068228.1	0.0773753	0.209877	1.4396	0.00468105	0.00974704
PPP1R1C	0.142616	0.398268	1.48161	0.00247023	0.00563656
CKLF-CMTM1	0.117563	0.261621	1.15405	1.56923e-05	7.24494e-05
AL024508.1	0.242659	0.577218	1.25019	0.00306293	0.00678451
KRT16	76.8444	204.664	1.41324	0.00504959	0.0104116
AL356299.2	0.207806	0.471236	1.18121	6.3135e-06	3.33236e-05
SETBP1	3.10707	0.924962	-1.74809	3.37059e-06	1.95494e-05
B4GALNT4	0.73165	5.3296	2.8648	0.00321556	0.00707063
UNC5CL	0.317395	0.91764	1.53165	0.00481958	0.0100066
CEP83-DT	0.0888786	0.229495	1.36855	7.33502e-06	3.7893e-05
MRPL14	33.9929	71.4444	1.07159	1.43937e-08	2.38999e-07
HIST1H3G	0.0542936	1.26204	4.53884	1.0129e-09	3.67622e-08
IGF2BP3	0.0352932	0.890458	4.65709	0.000170978	0.000565396
MAP3K21	0.433682	1.06102	1.29074	0.000207743	0.000670545
LIPK	0.0740419	0.564329	2.93012	0.000435585	0.0012679
RN7SL180P	0.0868965	0.254663	1.55122	0.0220422	0.0372358
KLHL35	0.135106	0.637496	2.23832	1.21124e-07	1.24188e-06
AL138724.1	0.789888	1.63379	1.0485	6.64184e-05	0.000249342
RFTN2	0.910464	0.439577	-1.05048	2.11141e-06	1.32187e-05
ZDHHC11B	1.70309	0.481546	-1.82241	8.10894e-09	1.56413e-07
AL604028.2	0.136656	0.328161	1.26386	0.00184972	0.00439993
NSUN5P1	1.5408	3.78854	1.29796	1.83894e-07	1.75326e-06
PPIAP3	0.127582	0.373193	1.5485	1.8422e-05	8.31424e-05
ZNF697	0.903204	2.14611	1.2486	6.09872e-07	4.67444e-06
CGAS	1.57775	3.72275	1.2385	0.000628964	0.00174549
CRYBB2P1	1.07569	2.23736	1.05653	2.27208e-08	3.34886e-07
TPD52L1	9.26795	4.61407	-1.00621	0.00731863	0.014379
FERMT1	5.99276	14.6104	1.2857	3.27068e-05	0.000135619
HSPA12A	2.1109	0.62475	-1.75651	6.04695e-08	7.12682e-07
2020-03-04	0.00752278	0.467409	5.95728	1.73073e-08	2.71519e-07
NLRP7	0.0606929	4.88002	6.32921	0.000156281	0.000523066
AC098614.4	0.49229	0.228471	-1.10749	7.76806e-05	0.000285946
NT5DC3	7.24282	1.38659	-2.38501	0.0194385	0.0333844
LINC02577	0.073377	0.671117	3.19316	1.70132e-05	7.77255e-05
NUP107	3.23568	8.56003	1.40355	4.09035e-09	9.54567e-08
MEN1	6.00784	15.0319	1.32311	1.32912e-11	3.71521e-09
AC093535.1	0.11277	0.292134	1.37325	0.00697701	0.0137887
AC017076.1	0.0627306	0.286558	2.19159	8.56848e-05	0.000311269
ZCCHC24	23.1641	4.37288	-2.40524	6.62261e-10	2.8965e-08
AC106820.3	0.319986	0.885816	1.469	1.16323e-05	5.59798e-05
MCM5	6.53952	14.5043	1.14922	4.50281e-08	5.67403e-07
LINC01820	0.0270766	0.391268	3.85304	0.00131976	0.00329905
AC083880.1	0.417362	1.50502	1.85041	1.00129e-08	1.80996e-07
LURAP1	1.3723	0.536065	-1.35612	4.79757e-08	5.95349e-07
SPTBN2	3.14423	6.44246	1.0349	0.000173753	0.000572855
SGCG	2.19254	0.164256	-3.73858	1.96043e-11	4.27716e-09
AC012073.1	0.364849	1.81739	2.3165	1.21383e-11	3.59596e-09
TPSD1	3.24703	0.703781	-2.20592	1.29169e-06	8.73367e-06
CCT2	27.9289	63.0036	1.17368	6.77616e-06	3.54055e-05
MAT2A	75.9767	29.5725	-1.3613	6.33389e-05	0.000238976
NR3C2	4.64515	0.644224	-2.85009	1.86931e-10	1.38086e-08
TFAP2A-AS1	0.364628	1.23109	1.75544	1.67338e-06	1.08983e-05
FADS3	2.17692	4.76982	1.13165	0.0182068	0.0315142
CTHRC1	9.76056	31.6397	1.6967	0.0200312	0.0342487
TCN1	3.71878	16.9393	2.18747	0.00826555	0.0159834
AC131009.3	0.762437	2.37738	1.64068	5.41567e-08	6.56423e-07
RPS20P33	0.348684	1.30973	1.90927	1.34923e-09	4.49657e-08
DNAJB4	16.3774	4.45128	-1.87941	5.67799e-08	6.7728e-07
AC145098.2	0.555114	0.232695	-1.25434	7.30074e-05	0.000270773
GPT2	3.58006	8.41348	1.23272	1.36924e-05	6.44046e-05
RPS6KA2	9.26745	3.26379	-1.50562	7.1956e-10	3.05455e-08
VIT	5.33908	0.255003	-4.388	2.50708e-11	4.75155e-09
RERG	5.81044	1.13184	-2.35998	1.52023e-08	2.48685e-07
PI16	96.4248	2.30067	-5.38928	1.14042e-12	1.81509e-09
XYLB	0.714356	1.81799	1.34763	5.38126e-06	2.91732e-05
SNORA33	4.7514	9.88111	1.05632	7.01902e-05	0.000261617
HAUS8	1.22991	2.5284	1.03967	1.0013e-08	1.80996e-07
AP001205.1	0.0387799	0.396017	3.35218	0.0218253	0.0369258
ZNF284	0.39724	0.810743	1.02923	3.1282e-07	2.7249e-06
LINC01572	0.0850706	0.270941	1.67125	1.53824e-06	1.01555e-05
MCTS2P	1.03788	2.12546	1.03414	0.002222	0.00514138
RHBG	0.445375	4.15564	3.22198	0.000872146	0.00231824
AL391825.1	0.113066	0.407129	1.84833	1.13765e-06	7.82757e-06
DQX1	1.14856	2.9014	1.33693	0.000831956	0.00222746
AC245100.4	0.203983	0.449245	1.13905	0.00124846	0.00314343
RAB37	1.73545	0.486528	-1.83472	9.36987e-09	1.73038e-07
C2orf40	15.6743	0.786376	-4.31703	5.24925e-12	2.66421e-09
CHRDL1	12.1724	1.58733	-2.93894	7.06743e-11	7.44979e-09
CCL19	44.3653	13.4284	-1.72414	0.00134149	0.00334318
CLEC18B	0.0849648	0.226055	1.41173	0.00396587	0.0084761
SLC4A11	2.91458	6.48698	1.15426	0.00177004	0.00423991
RTEL1-TNFRSF6B	0.188818	0.39542	1.06639	2.1982e-05	9.67054e-05
AC092755.2	0.114766	0.306156	1.41557	0.000549899	0.00155318
AC073195.1	0.187842	0.83917	2.15944	6.48921e-11	7.29084e-09
CX3CR1	0.572772	0.273092	-1.06857	0.00137691	0.00342094
INHA	0.202189	1.03159	2.35109	5.19019e-05	0.000201546
AC009121.2	0.093734	0.241716	1.36667	0.00207288	0.00484321
NACC2	15.5697	3.44746	-2.17513	2.17598e-08	3.24031e-07
ARHGAP10	6.69614	2.844	-1.23541	7.91535e-07	5.79686e-06
AC021321.1	0.167971	0.475718	1.5019	1.18348e-05	5.68936e-05
RNF112	1.51957	0.317589	-2.25843	4.65111e-11	5.9367e-09
ATP2C2-AS1	0.157693	0.472957	1.58459	0.000589016	0.00164828
CGNL1	6.95941	0.891764	-2.96423	2.01148e-10	1.43504e-08
PCAT6	2.1992	8.61298	1.96953	2.94126e-08	4.08187e-07
PPP1R12A	16.5622	5.37163	-1.62447	0.000119013	0.000412839
AC025857.2	2.06267	5.27305	1.35412	5.01054e-06	2.7473e-05
AC112484.1	0.259737	0.55474	1.09476	0.0062835	0.0125918
AGAP1-IT1	0.0929414	0.388596	2.06388	1.12814e-05	5.45549e-05
ZFP36	881.859	137.603	-2.68003	4.20841e-10	2.15156e-08
LRRC69	0.202504	0.520152	1.36098	0.000108546	0.000381969
AC069544.1	0.39673	1.27517	1.68446	1.4054e-09	4.60202e-08
C2CD4D	0.177395	0.394969	1.15477	0.0217962	0.0368809
LAIR2	0.178642	0.467625	1.38828	0.0163807	0.0287727
AC090164.2	0.0327012	0.500973	3.93732	0.00206776	0.00483455
C2orf66	0.114225	0.30748	1.42861	0.0233342	0.0391121
SLC7A9	0.0913586	0.244524	1.42037	0.0202318	0.0345451
MS4A2	1.27646	0.289913	-2.13845	2.10808e-09	5.96637e-08
EFNA2	0.116699	0.649583	2.47672	0.0228158	0.0383424
BLK	1.55195	0.518591	-1.58141	0.013402	0.0242255
AC091182.2	0.149973	0.855916	2.51276	0.00797426	0.0154951
PKIB	0.694859	2.56656	1.88504	0.0021266	0.00494993
AC010615.2	0.194504	0.730581	1.90925	0.000826352	0.00221499
AC010326.4	1.68531	5.05889	1.58581	2.94081e-09	7.4869e-08
SERTAD1	34.9981	14.8048	-1.24121	0.000168623	0.0005582
LINC01410	0.790843	2.3435	1.5672	3.25021e-06	1.89803e-05
ARHGEF19	6.27852	13.326	1.08574	0.000324337	0.000982966
LINC00649	0.341682	0.960657	1.49137	1.02192e-05	5.02076e-05
PQLC2	3.60902	9.28307	1.363	9.98779e-12	3.40729e-09
PLP1	2.69379	0.154726	-4.12185	7.56585e-13	1.81509e-09
FAM149A	3.33403	1.01899	-1.71012	9.47419e-09	1.74279e-07
RPL39P18	0.0819516	0.256504	1.64614	0.00200658	0.00472211
PCMTD1P3	0.0666024	0.236252	1.82668	0.000209059	0.000674483
LINC01096	0.0458843	0.264361	2.52644	0.000712404	0.00194597
TBL1XR1-AS1	0.0275948	0.284225	3.36456	0.0224117	0.0377749
CCDC80	36.8499	6.61459	-2.47794	3.84066e-08	5.01128e-07
DGKG	1.34896	0.305257	-2.14375	2.61009e-06	1.57927e-05
RNA5SP18	0.132609	1.13018	3.0913	0.00016153	0.000538136
PPIL1	11.281	22.7226	1.01023	2.47661e-09	6.65741e-08
RNU6-658P	0.175162	0.406882	1.21592	0.0213407	0.036204
AC106028.3	0.180426	0.594071	1.71923	1.30127e-07	1.32191e-06
RPL17P11	0.0436261	0.284391	2.70461	0.0156455	0.0276626
LINC02166	0.203528	0.444818	1.12799	5.10789e-05	0.000198837
TBX1	1.3859	8.67716	2.6464	0.00499118	0.0103127
FRY	4.76817	2.20516	-1.11255	6.42646e-06	3.38042e-05
AC117402.1	0.142235	1.01785	2.83918	0.00603149	0.0121452
CYP26A1	0.0521671	0.448622	3.10429	0.00115472	0.00293776
S100A7	46.7744	277.208	2.56718	0.00721412	0.0141915
CEMIP	0.851655	3.22237	1.91978	0.000428427	0.00124978
ATAD2	2.88671	9.00061	1.6406	7.42005e-09	1.46704e-07
TBX20	4.29353	0.257842	-4.05761	0.000283484	0.000873688
MIR503HG	0.642142	1.37709	1.10066	0.00740108	0.0145273
PNMA1	30.0578	12.5243	-1.26301	0.000169892	0.000561905
AC015849.3	0.872397	1.78255	1.03089	0.0109827	0.0203948
AC099066.2	0.0469647	0.293481	2.64362	0.00293588	0.00653373
AC015819.1	0.719426	0.356277	-1.01385	0.0161109	0.0283688
SMG1P7	0.254711	0.736919	1.53265	4.9708e-07	3.97389e-06
RNASE4	1.2325	0.366498	-1.74971	5.20953e-11	6.34716e-09
JPH2	18.4228	2.02446	-3.18588	9.86455e-07	6.94256e-06
BNC2	2.09478	0.466144	-2.16795	9.77095e-07	6.89997e-06
TACC1	23.3678	9.50084	-1.2984	1.50966e-06	1.00056e-05
TCIM	180.709	49.218	-1.87641	1.48159e-06	9.84389e-06
AL109615.3	0.0908147	1.03383	3.50893	2.51201e-07	2.25303e-06
AC114488.1	0.376307	1.86929	2.31251	9.22684e-05	0.000331599
ANKLE1	0.156756	0.457987	1.54679	0.00101732	0.0026467
DAAM2	3.95328	1.01652	-1.9594	9.70105e-06	4.80393e-05
CSAG2	0.175407	0.988403	2.4944	0.00110034	0.00282509
ZNF436-AS1	0.998006	2.10075	1.07378	0.00135028	0.0033628
AC096921.2	0.753888	0.368439	-1.03292	6.7141e-08	7.76675e-07
KIF18B	0.741483	6.16644	3.05595	1.55221e-11	3.93365e-09
CD40LG	0.807344	0.286448	-1.49491	6.53139e-05	0.000245884
AC093162.2	1.92582	4.03738	1.06795	0.00248562	0.00566563
ITPKB	19.6798	5.47362	-1.84615	4.05013e-08	5.22286e-07
PAIP1P1	0.179802	0.37641	1.06589	0.0030817	0.00681868
MVK	2.90849	6.08121	1.06409	8.22533e-07	5.97491e-06
P4HB	110.367	233.727	1.08251	1.35712e-09	4.50685e-08
BEAN1	0.103367	0.438473	2.08471	0.0106916	0.0199211
STK24-AS1	0.24815	0.519817	1.06679	0.000232059	0.000735993
ADCY10P1	0.535814	1.29648	1.27479	0.00516829	0.0106236
LDB2	4.51316	1.64799	-1.45343	2.1574e-09	6.07796e-08
AL353572.1	0.0738894	0.299695	2.02005	0.0105297	0.0196625
TP63	10.5906	21.2201	1.00265	0.0108654	0.020203
DSCC1	1.34197	4.3083	1.68277	2.97294e-08	4.11366e-07
AC098614.1	2.60336	1.16186	-1.16394	2.41339e-07	2.17704e-06
SCN8A	0.0767098	0.288189	1.90953	0.00262784	0.00594779
LYPD6B	5.34445	10.8626	1.02326	0.00233583	0.00537758
GPR78	0.198191	1.29267	2.70539	0.000293131	0.000898857
KLHL15	2.96004	1.42102	-1.05869	1.30071e-05	6.1598e-05
RFC5	3.54533	8.65341	1.28735	6.94434e-10	2.97481e-08
NPAS4	0.69976	0.27327	-1.35653	1.25759e-12	1.81509e-09
AC119403.1	0.190064	0.553377	1.54178	0.000197232	0.000640923
HLA-G	1.62667	4.18834	1.36446	0.0121546	0.0222754
NUDT1	6.26041	14.4956	1.21128	4.68477e-09	1.05649e-07
GLA	8.44718	17.061	1.01416	1.37426e-06	9.22881e-06
HOXC8	0.0686103	0.663032	3.27258	0.000493719	0.00141451
CAVIN2	43.0681	3.71405	-3.53555	3.87496e-12	2.64326e-09
RRM2	5.48455	20.1898	1.88018	9.75854e-08	1.04988e-06
SPDYC	0.0154563	1.01108	6.03156	1.31267e-05	6.20862e-05
PGM5-AS1	59.8663	2.00724	-4.89846	2.18562e-12	2.11941e-09
U62317.2	3.40785	8.26511	1.27817	6.5991e-06	3.4625e-05
AL390728.4	3.51533	8.31447	1.24196	1.02192e-05	5.02076e-05
AC104687.2	0.12431	0.600314	2.27177	0.000227468	0.000724368
AC073534.1	0.213701	0.711271	1.7348	0.0036608	0.00791058
ARHGEF15	3.51602	1.69841	-1.04975	5.38126e-06	2.91732e-05
LYNX1	9.49843	4.07505	-1.22087	2.20493e-07	2.02106e-06
SLC30A3	0.0309742	0.235696	2.92779	0.00812933	0.0157622
RSPO2	1.03895	0.215049	-2.27239	4.19134e-07	3.46594e-06
AC092155.2	0.848151	0.341276	-1.31338	1.67701e-07	1.62359e-06
KRT8P36	0.209777	0.45619	1.12078	0.00219434	0.00508493
AC137767.1	0.227798	0.726114	1.67244	2.18287e-07	2.00574e-06
MAGEA3	1.72203	11.3962	2.72637	0.0100533	0.0188895
PAICS	9.32743	20.9776	1.1693	1.69254e-09	5.14703e-08
MCM10	0.681889	3.22737	2.24275	6.13621e-09	1.28497e-07
TMEM119	17.3362	5.8088	-1.57748	3.85079e-05	0.000156289
AC069257.2	0.131038	0.464699	1.82631	0.0013233	0.00330703
HM13	11.8095	24.0715	1.02737	1.36269e-08	2.2931e-07
CLPB	2.64512	5.6669	1.09923	1.50114e-07	1.48711e-06
RGS1	24.7732	12.3664	-1.00236	4.56435e-05	0.000180601
AC068831.1	0.0819737	0.278676	1.76535	5.18493e-09	1.1405e-07
AC002550.2	0.503096	1.15534	1.19941	7.8686e-06	4.01628e-05
MYH3	5.30804	0.807963	-2.71582	0.000540068	0.00152863
PGP	5.01992	10.4095	1.05216	1.94466e-09	5.65699e-08
NDUFB2-AS1	0.432174	1.01153	1.22685	6.7141e-08	7.76675e-07
MT1M	9.77206	3.62864	-1.42923	2.91324e-06	1.73477e-05
MYL9	1350.9	113.281	-3.57593	6.78631e-09	1.37507e-07
ZNF610	0.59327	1.22295	1.0436	0.0102399	0.0191997
USP12	12.8474	5.52502	-1.21743	1.49556e-06	9.92265e-06
AC100801.1	0.0127944	1.04763	6.35547	0.00140721	0.00348286
BIN1	16.7546	4.4488	-1.91307	1.62311e-08	2.59186e-07
ZNF707	1.30784	2.76641	1.08083	3.56959e-09	8.60877e-08
AL031710.2	0.0808426	0.22054	1.44785	0.00141057	0.00349071
ANKRD19P	0.425843	2.53948	2.57614	1.27443e-06	8.64191e-06
CHAF1A	4.82216	11.2941	1.22782	9.57964e-09	1.75359e-07
HABP4	6.26561	2.66792	-1.23174	3.48868e-07	2.97536e-06
GINS4	0.491112	1.61359	1.71615	1.38356e-07	1.39194e-06
C6orf136	5.71392	11.5759	1.01857	4.6973e-08	5.86397e-07
ARHGAP8	0.178477	0.496251	1.47533	1.05786e-05	5.16518e-05
RNY3P16	0.737323	1.48518	1.01027	0.00382248	0.00821172
MTERF3	7.0056	14.0255	1.00147	5.47497e-10	2.58758e-08
KCNAB3	0.306701	0.692591	1.17517	0.000396282	0.00116891
ADARB1	12.7943	2.63854	-2.27769	0.000353528	0.00105861
AL358075.2	0.355304	1.00592	1.50139	0.00554506	0.0112991
LRRIQ4	0.0833988	0.395303	2.24486	0.000389524	0.00115315
AL449212.1	0.484977	1.20192	1.30935	4.52765e-05	0.000179226
AC080080.1	0.0877838	0.316906	1.85203	2.39798e-08	3.4933e-07
RNU6-45P	0.153468	0.402587	1.39136	0.0137639	0.0247867
AL390719.1	1.67952	4.31464	1.36119	0.00487618	0.0101152
RF00569	1.09763	2.89497	1.39916	0.00103425	0.00268479
ENTPD1	6.99853	3.27342	-1.09625	0.000139656	0.000474444
AP003733.4	0.129942	0.388873	1.58143	7.6091e-08	8.57475e-07
PPIAP2	0.181962	0.380578	1.06455	0.000521547	0.00148275
IL6R	4.08572	1.93937	-1.075	2.82045e-05	0.000119485
AGAP2	0.833334	1.75093	1.07115	0.00333448	0.00729364
RN7SL192P	0.142174	0.429395	1.59465	0.00413653	0.00878381
MYLK	75.2987	5.05886	-3.89574	9.79398e-09	1.77894e-07
CCDC17	0.328065	0.672266	1.03505	0.0013328	0.00332544
C11orf45	0.419842	0.893125	1.08901	0.000591068	0.00165279
ABHD3	2.51905	5.31923	1.07834	1.92439e-06	1.22315e-05
CEP55	2.753	11.4146	2.0518	3.29625e-09	8.13783e-08
C2orf27A	0.782346	1.64155	1.06918	9.12825e-06	4.54668e-05
NAPSA	0.147207	0.341772	1.21518	0.000106889	0.000377196
AC060766.5	0.155981	0.333999	1.09847	0.020324	0.0346987
PRSS41	0.0251755	0.447472	4.1517	0.00894752	0.0171082
CXCL5	0.332086	4.83858	3.86496	0.00183709	0.00437649
AC024558.1	0.193499	0.428071	1.14553	0.00288808	0.00644648
SNORD60	1.23928	3.59484	1.53642	7.11871e-07	5.3244e-06
MAGOH2P	0.534021	0.199806	-1.41829	4.29122e-06	2.41139e-05
HIST1H4B	0.0301896	1.96299	6.02286	9.73499e-06	4.81946e-05
HIST1H2BL	0.105379	1.22948	3.54439	1.98033e-05	8.84901e-05
CENPL	0.717766	1.96563	1.45341	3.4108e-09	8.3221e-08
PTGDS	77.6312	16.4003	-2.24291	1.67705e-08	2.6554e-07
MGARP	0.730944	0.181279	-2.01155	3.11112e-05	0.000130022
TBC1D7	1.07691	2.71656	1.33488	1.96296e-10	1.42204e-08
PCGF1	3.3825	7.39115	1.12771	3.75166e-11	5.36014e-09
SPATA17	0.124733	0.550033	2.14067	7.69027e-07	5.65853e-06
FAM50B	5.45585	2.71058	-1.0092	4.87793e-06	2.684e-05
AP002807.1	0.812786	1.6856	1.05232	0.000387915	0.00114893
MPP7	8.81431	4.33941	-1.02235	2.83449e-06	1.69753e-05
BRCA1	0.97762	3.04408	1.63866	6.34587e-09	1.31421e-07
MYBL2	6.89751	40.1575	2.54152	1.04926e-09	3.77874e-08
PDLIM4	13.9041	6.93006	-1.00457	8.00768e-06	4.07287e-05
KLF9	29.1047	5.48223	-2.40842	2.98487e-11	4.93093e-09
CLIP4	6.55148	2.94377	-1.15415	5.0555e-06	2.76872e-05
ZNF69	1.34252	2.7116	1.01421	0.00550779	0.0112305
AC233280.2	0.0865867	0.622352	2.84551	2.39697e-08	3.4933e-07
NAP1L5	5.97899	2.20698	-1.43782	2.27224e-10	1.52495e-08
SOX7	7.10602	3.15142	-1.17304	2.51168e-05	0.000108662
BMP5	5.98414	0.616628	-3.27867	4.73499e-09	1.0621e-07
SLC25A23	27.0247	7.30695	-1.88694	5.55992e-08	6.67867e-07
CD3EAP	1.07179	2.72248	1.3449	5.0127e-09	1.11174e-07
CST6	2.5258	43.6134	4.10996	4.18711e-07	3.46396e-06
NKX2-8	0.0963673	0.764787	2.98844	0.00093188	0.00245539
PRUNE2	15.8057	0.996642	-3.98722	3.27336e-08	4.41856e-07
MEX3D	6.5158	13.3964	1.03983	5.6978e-07	4.43969e-06
TAS1R3	0.237238	0.985158	2.05402	0.00269348	0.00607499
LINC00654	0.569029	0.272636	-1.06152	0.00141316	0.00349298
C19orf48	10.0008	29.1071	1.54125	2.50436e-10	1.60373e-08
LINC00355	0.114975	0.705114	2.61654	8.52362e-05	0.000309879
ZBTB4	29.7213	14.3214	-1.05332	2.47679e-08	3.56927e-07
FRMD6-AS1	0.148706	0.306755	1.04463	0.00206077	0.00482062
C1GALT1P1	0.03467	0.324897	3.22822	0.000190897	0.00062368
ALDH1L1	8.20543	3.99259	-1.03925	0.00262789	0.00594779
SVIL	63.5447	10.7684	-2.56097	0.000104447	0.000369413
ZFHX4	1.52391	0.444009	-1.77911	1.18348e-05	5.68936e-05
AC245060.5	0.188175	0.432169	1.19952	0.000270617	0.000839272
P3H1	3.71766	8.09938	1.12342	2.47007e-06	1.50767e-05
AC092910.3	0.210285	0.506927	1.26943	2.83449e-06	1.69753e-05
AC004461.1	0.0854103	0.211228	1.30632	0.00195158	0.00460598
AC100778.2	0.133913	0.278037	1.05398	0.00992471	0.0186853
AC008105.2	0.884702	1.79499	1.02072	0.0113111	0.0209342
SCNN1G	4.55645	15.8264	1.79635	0.0284675	0.0464356
CTSV	0.675378	4.59608	2.76664	1.78634e-06	1.14863e-05
GPR89A	0.406947	0.89617	1.13893	4.01111e-10	2.07329e-08
AC244034.2	0.103797	0.229507	1.14478	0.0107994	0.0201021
CCL2	92.565	12.4597	-2.8932	1.52388e-06	1.00785e-05
CCDC77	1.58426	3.35652	1.08316	4.84848e-08	6.0008e-07
TPSG1	1.20876	0.159093	-2.92559	4.97435e-10	2.42525e-08
MIR7111	0.593756	2.60387	2.13272	1.55046e-08	2.51979e-07
AC068533.2	0.0642272	0.290551	2.17753	0.000803642	0.00216514
CDC42BPA	8.45702	3.4041	-1.31288	2.1799e-05	9.60128e-05
AC005537.1	0.198504	0.402587	1.02013	0.00941039	0.0178603
SYPL2	1.48768	0.305976	-2.28157	1.92439e-06	1.22315e-05
MIR6859-1	0.121625	0.75886	2.64139	5.06302e-05	0.000197537
C1orf21	10.8178	4.99158	-1.11584	1.67303e-09	5.10424e-08
SNHG3	4.238	9.99393	1.23767	3.15942e-07	2.74446e-06
C3orf18	3.29733	1.29908	-1.3438	0.000130427	0.000446406
AC007773.1	0.313117	1.24471	1.99103	1.10431e-07	1.15949e-06
AC069499.1	0.203756	0.609742	1.58136	0.000140556	0.000477245
SLC25A4	14.8627	5.65454	-1.39422	9.95902e-07	6.9933e-06
RASGRF1	0.113831	0.401868	1.81983	0.00850425	0.0163757
CXCL9	4.40377	24.1808	2.45705	0.0261134	0.0430891
FOXL2	0.0752184	0.824376	3.45414	1.53777e-05	7.13658e-05
LINC01819	0.915489	5.19022	2.50318	0.00244696	0.00559565
EBF3	1.32533	0.467251	-1.50408	2.17598e-08	3.24031e-07
AL359091.5	0.620562	1.51142	1.28426	0.000414993	0.00121836
AC008109.1	0.258575	1.32612	2.35856	0.000304081	0.000927869
BLOC1S3	3.81122	9.15063	1.26362	7.63421e-10	3.14413e-08
AC144652.1	0.54888	1.38656	1.33694	4.94664e-05	0.000193362
PUS7	2.48392	5.53183	1.15514	1.65374e-09	5.07013e-08
FGFR1	13.6027	3.81991	-1.83228	1.12571e-09	3.94799e-08
MEIS1	5.16113	1.7769	-1.53833	1.08683e-09	3.86949e-08
FAM57B	0.0143685	0.226598	3.97916	1.77885e-05	8.08305e-05
INA	3.44525	14.2934	2.05267	0.00761085	0.0148784
GAPDHP1	2.87425	10.6483	1.88936	0.00132413	0.00330734
FBXL22	6.4418	0.703449	-3.19495	5.48024e-07	4.30593e-06
AC073107.2	0.0496002	0.317417	2.67796	5.24527e-06	2.86013e-05
AIM2	2.89095	11.6192	2.0069	0.018299	0.0316447
HKDC1	0.361955	0.820319	1.18037	0.0240448	0.0400973
AP002387.1	2.32575	5.17935	1.15508	4.45524e-05	0.000176993
ADH1B	27.1307	1.40492	-4.27137	1.24653e-12	1.81509e-09
STRIP2	0.202455	1.15593	2.51338	7.17593e-09	1.43389e-07
LINC02012	0.272383	0.706784	1.37563	0.0208458	0.0354478
STARD10	10.2511	20.9943	1.03423	0.000260927	0.000813657
TRIM59	0.585352	1.55686	1.41126	2.23322e-09	6.24471e-08
SNORA14B	0.271428	1.06794	1.97619	0.000688243	0.00188932
AC010463.3	0.17894	0.546296	1.61021	2.33993e-05	0.000102174
FIRRE	0.0664667	1.00781	3.92244	1.85624e-09	5.46069e-08
CASC8	0.251554	0.773697	1.6209	0.00544457	0.0111185
ADAMTS4	19.0108	3.12545	-2.60468	0.000217167	0.000695462
CREB3L4	3.68053	8.23819	1.16241	1.81211e-05	8.19884e-05
SNORD1B	0.214469	0.580908	1.43754	0.00266934	0.00602924
BEND3P1	0.236563	0.500434	1.08095	0.00791161	0.0153882
COX6B1P5	0.0681507	0.218382	1.68005	0.00079653	0.00214731
AC009275.1	0.486001	1.45202	1.57903	2.82045e-05	0.000119485
GTF2IP23	0.711389	1.4968	1.07317	0.002829	0.00633457
CIT	0.725971	2.46674	1.76462	1.99548e-08	3.03413e-07
SRD5A1	1.33611	3.47454	1.37878	2.31849e-07	2.10765e-06
DCST2	0.250732	0.610616	1.28412	0.000377015	0.00112036
AC124944.2	0.131969	0.749143	2.50504	5.41562e-08	6.56423e-07
CDK5R1	0.948038	2.15486	1.18458	0.000878057	0.00233093
AC004837.2	0.0873727	0.208468	1.25457	0.00355171	0.00770681
C20orf204	0.142944	0.430409	1.59025	2.04405e-06	1.28743e-05
AC025287.2	0.0908968	0.217824	1.26086	0.000950709	0.00249939
CDK2	7.40664	17.0404	1.20207	2.94126e-08	4.08187e-07
FBXO5	1.22288	2.96868	1.27954	5.80968e-07	4.49885e-06
LINC01977	0.0860655	0.520096	2.59527	1.28599e-06	8.70185e-06
JCAD	11.4265	3.33543	-1.77644	0.000446971	0.00129642
HIST1H4PS1	0.024855	0.209013	3.07198	0.000655881	0.00180922
AL355488.1	0.619689	2.33725	1.91519	2.65303e-09	6.94265e-08
PRDX1P1	0.0980119	0.305924	1.64215	0.00567773	0.0115194
CHRM2	4.44912	0.270592	-4.03933	6.63306e-11	7.36426e-09
BAAT	0.00817865	1.07381	7.03665	0.0130785	0.023746
CFAP47	0.0208138	0.257421	3.62852	0.000282361	0.000871386
DIRAS3	1.66827	0.66785	-1.32076	2.45025e-08	3.54738e-07
ODAPH	0.0165419	0.805399	5.60551	1.1776e-07	1.21939e-06
GINS1	1.57379	7.12381	2.17841	6.02217e-10	2.7162e-08
AC053503.6	4.55243	0.259373	-4.13354	7.26499e-10	3.07009e-08
SLC35A2	7.83912	19.3243	1.30165	2.9746e-09	7.56267e-08
GBX1	0.00305794	0.214565	6.13271	0.00021526	0.000691051
KPTN	3.4829	7.92488	1.1861	6.63629e-09	1.35492e-07
NFIL3	49.8986	15.3981	-1.69624	7.7646e-07	5.70651e-06
SLC25A5P5	0.116844	0.636359	2.44526	4.42659e-06	2.46824e-05
GLOD5	0.107898	0.258331	1.25955	0.0030269	0.0067132
ZNF154	1.32522	0.484756	-1.4509	1.89557e-07	1.79176e-06
CLEC5A	0.161171	0.790001	2.29326	1.6097e-05	7.40993e-05
PAM16	2.27932	4.57241	1.00435	5.55992e-08	6.67867e-07
AL121992.3	0.138304	0.285101	1.04364	0.000949462	0.00249646
ZEB1	12.7741	2.18516	-2.54741	2.01391e-07	1.88464e-06
TNS2	16.9706	4.65963	-1.86475	2.49666e-11	4.75155e-09
SEC14L2	0.982761	3.03292	1.62579	1.97129e-05	8.81279e-05
MIR4292	2.0182	5.15014	1.35155	4.07591e-06	2.30634e-05
MYOM1	9.03089	0.496618	-4.18466	8.70109e-11	8.37223e-09
Z94721.1	0.0966348	0.373934	1.95217	3.13645e-06	1.84192e-05
CPHL1P	0.0300054	0.224274	2.90197	0.0098787	0.0186117
LINC01816	0.393918	0.972059	1.30315	0.00859855	0.0165285
NCR3	1.33607	0.386429	-1.78972	0.0201649	0.034446
SLC6A8	12.6007	31.8708	1.33874	0.0090346	0.0172395
MAGI2-AS3	2.06135	0.555257	-1.89236	2.47661e-09	6.65741e-08
AC136628.3	4.05633	1.49419	-1.44082	6.78416e-07	5.11009e-06
HIST1H1E	0.244417	6.96949	4.83363	4.00737e-08	5.17973e-07
SEMA3E	2.50087	0.539871	-2.21175	2.71391e-09	7.07394e-08
AL356274.1	0.0438327	0.268711	2.61598	0.000739844	0.00201097
KCNMA1	6.66273	0.506827	-3.71655	5.00438e-08	6.14913e-07
TMEM52B	0.0724969	1.38614	4.25701	7.01922e-06	3.65539e-05
ESPL1	1.70388	3.52611	1.04926	1.53201e-07	1.51131e-06
AL645608.3	0.126383	1.03439	3.03291	0.00585148	0.0118208
RIPPLY3	0.664658	3.06043	2.20305	7.43218e-06	3.83631e-05
APBB1	8.65277	2.50132	-1.79047	1.26196e-08	2.15452e-07
CNNM1	0.735012	0.199338	-1.88255	8.79694e-08	9.69516e-07
SLCO1A2	0.0347676	0.212881	2.61423	0.00186667	0.00443345
GFY	0.00842097	0.321279	5.2537	5.36199e-05	0.000207181
ISYNA1	14.6921	37.7975	1.36325	0.000761809	0.00206349
KLF2P1	0.0110028	0.56325	5.67783	3.50519e-05	0.000143881
AL035420.3	0.069822	0.34774	2.31626	2.711e-05	0.00011579
ST20	0.839055	1.81073	1.10973	1.24611e-05	5.93721e-05
C9orf66	0.225914	0.471927	1.06279	0.0184847	0.0319335
ANKRD29	1.66933	0.47739	-1.80603	2.84816e-08	3.97621e-07
LAMA2	7.88706	1.63462	-2.27053	2.18239e-09	6.13916e-08
NRIR	0.0604764	0.489647	3.0173	1.4107e-06	9.45997e-06
AC021491.4	0.100597	0.487086	2.27559	0.00127308	0.00319722
AC006128.1	0.563499	1.80995	1.68346	1.61197e-06	1.05751e-05
SAMD10	3.59529	7.87799	1.13172	0.000209286	0.000674483
APOBEC3B	2.95549	11.3229	1.93777	2.14373e-05	9.46641e-05
RASSF7	12.047	28.9252	1.26365	9.45148e-06	4.69024e-05
LINC02159	0.113151	0.230199	1.02463	0.0123686	0.0226059
AREG	72.7297	26.1791	-1.47413	0.00242468	0.00555215
FMR1-IT1	0.270235	0.546204	1.01522	0.0129988	0.0236174
AF001548.1	6.77492	0.216361	-4.96869	2.46405e-10	1.59526e-08
AC139783.1	0.0102752	0.242816	4.56262	0.00163586	0.00396661
CLPSL1	0.0261463	0.37896	3.85736	1.37859e-05	6.48282e-05
HIST3H2BB	0.141977	1.12302	2.98366	1.1557e-08	2.01528e-07
EFNA1	18.6198	46.185	1.31059	4.6385e-05	0.000183033
ZNF215	0.330608	0.72911	1.14101	0.00617703	0.012401
GDNF	0.41352	0.195128	-1.08354	0.00202182	0.0047475
MIR4653	1.44966	8.27659	2.51333	3.48893e-09	8.45867e-08
LINC02489	1.39345	0.166683	-3.06349	8.05207e-11	7.9937e-09
AP000577.1	0.0865515	0.296301	1.77543	0.00382495	0.00821514
PCAT7	0.759278	1.79305	1.23972	0.00131549	0.00328889
AL365356.5	0.169454	4.58865	4.75911	2.30146e-07	2.09623e-06
ZNF91	1.48555	3.00134	1.0146	0.0290156	0.0472054
NCS1	33.5493	9.42039	-1.83242	5.19273e-06	2.83477e-05
NRBF2P5	0.0834824	0.32947	1.9806	0.000139567	0.000474444
AL589765.4	0.434638	1.45686	1.74498	1.9972e-06	1.26216e-05
LINC00702	2.55154	0.294451	-3.11527	5.40214e-05	0.000208346
MIR6745	0.0340647	0.214542	2.65491	0.00209107	0.00488299
SHE	1.41997	0.490827	-1.53258	4.23168e-09	9.79025e-08
LINC01169	0.0268467	0.278676	3.37577	0.00286167	0.00639817
ERVV-2	0.00128786	0.488757	8.568	1.01456e-06	7.10123e-06
AL354836.1	4.57706	9.32877	1.02727	0.00423509	0.00895157
AC138150.2	0.157086	0.488104	1.63564	1.31102e-06	8.8421e-06
PRDX4	22.8373	46.3758	1.02198	3.28736e-07	2.8385e-06
ZP3	1.08692	2.91757	1.42452	1.6097e-05	7.40993e-05
PNKP	6.30968	13.3721	1.08359	2.64195e-08	3.7412e-07
AC107959.1	0.576342	0.190808	-1.5948	2.47413e-10	1.59526e-08
AGRN	16.0839	49.976	1.63561	6.4895e-09	1.33543e-07
CTSG	12.4415	1.87392	-2.73103	5.22141e-09	1.14718e-07
AC141557.2	0.145758	0.754995	2.37289	6.67176e-06	3.49671e-05
RLN1	0.0662806	0.31066	2.22868	0.0017096	0.00412515
PTX3	13.0602	3.18861	-2.03418	1.92216e-05	8.6241e-05
ABCA12	0.358037	1.11547	1.63947	0.000252484	0.00079114
KMO	0.129547	0.354186	1.45103	0.00423509	0.00895157
JDP2	8.5966	3.82714	-1.1675	1.31102e-06	8.8421e-06
AC008610.1	0.956963	2.0251	1.08146	2.05579e-05	9.12748e-05
POPDC2	26.62	2.07625	-3.68046	7.66431e-06	3.93233e-05
WDHD1	0.948578	3.18783	1.74873	1.83545e-09	5.42339e-08
TUBG1	12.9884	29.6817	1.19235	1.16595e-09	4.04376e-08
GMPSP1	0.198923	0.542249	1.44674	6.15785e-07	4.71616e-06
RUVBL1	5.17894	11.6759	1.1728	1.52465e-09	4.78379e-08
KIF24	0.347095	1.19548	1.78419	8.29353e-09	1.59275e-07
SLC39A4	2.43558	10.2819	2.07777	1.07416e-09	3.85364e-08
CENPH	2.27398	6.81887	1.58431	1.15238e-09	4.019e-08
CYP4F23P	1.17478	6.15402	2.38914	0.0114091	0.0210843
TMEM160	7.34418	15.712	1.09719	5.61865e-08	6.73198e-07
OR7E126P	0.0774944	0.354118	2.19206	1.95363e-07	1.83394e-06
MEDAG	16.2647	3.7679	-2.10991	8.14676e-07	5.92242e-06
NKILA	0.337973	1.26443	1.9035	0.00959428	0.0181396
MTX1	3.02	6.29927	1.06063	4.31188e-11	5.82042e-09
ZNF681	0.547636	1.50272	1.45629	4.31361e-05	0.000172351
SUCLA2-AS1	0.346856	0.702765	1.01871	4.49133e-05	0.000177975
SNORD83A	0.614876	1.46027	1.24787	0.00579306	0.011723
TGFB1I1	25.6236	6.40102	-2.0011	7.99177e-07	5.83461e-06
MAP3K9	0.603697	1.21212	1.00563	0.000301751	0.000921959
CUZD1	0.188871	0.423592	1.16528	0.000210834	0.000679026
AC010329.2	0.0624481	0.733545	3.55416	0.0284524	0.0464341
TNFAIP8L3	8.2167	1.78742	-2.20068	8.90023e-10	3.38046e-08
U73166.1	0.168647	0.348778	1.0483	0.0189564	0.0326431
OXSM	2.47422	4.95044	1.00058	9.16456e-09	1.7127e-07
AC004466.3	0.0861348	0.339149	1.97725	2.199e-05	9.67179e-05
SORBS2	11.5114	1.18051	-3.28558	3.59963e-10	1.97485e-08
CYTL1	6.43316	1.9425	-1.72762	2.01722e-08	3.05975e-07
MEOX1	4.20389	0.910702	-2.20667	3.07825e-09	7.74229e-08
CLCN2	0.932271	2.82105	1.59741	4.04776e-11	5.58443e-09
DOCK11	3.94048	1.74475	-1.17535	6.64184e-05	0.000249342
FOXD1	0.193242	1.5685	3.02091	0.0268675	0.0441929
AC023024.1	0.0885918	0.269991	1.60766	8.40606e-05	0.000305902
SSPN	9.24954	2.8542	-1.69629	6.11066e-08	7.18836e-07
GPM6B	2.8411	1.00355	-1.50134	7.63421e-10	3.14413e-08
CDC7	1.3699	4.54255	1.72943	1.04653e-08	1.87011e-07
COLGALT2	0.939116	0.325757	-1.52751	1.52023e-08	2.48685e-07
PWAR6	1.98712	0.74112	-1.4229	3.48867e-07	2.97536e-06
AC010491.1	0.0910443	0.291242	1.67758	6.03981e-07	4.64258e-06
HMGA1	67.751	166.383	1.29619	7.20716e-06	3.73765e-05
MIR181A2HG	0.323162	1.39262	2.10748	7.73112e-06	3.96156e-05
LPAR2	6.80154	14.0604	1.0477	6.58955e-05	0.000247725
RAET1K	0.0175918	0.216702	3.62274	4.42667e-10	2.22079e-08
AC009121.1	0.0395162	0.222342	2.49226	3.97178e-07	3.32096e-06
FCGR3A	4.59462	19.5906	2.09214	0.00782594	0.0152417
HIST1H2APS3	0.00614144	0.767068	6.96463	1.63418e-07	1.58953e-06
MTX1P1	1.43082	2.86494	1.00166	0.000416466	0.00122039
AC004263.1	0.0624527	0.206509	1.72537	0.00030764	0.000937206
AP000523.1	0.0674807	0.432206	2.67917	3.40915e-07	2.92348e-06
AC018904.1	2.49906	8.69912	1.79948	4.70633e-06	2.60563e-05
SSBP2	3.17929	1.33489	-1.25198	1.34783e-08	2.27423e-07
LRRN4CL	6.11431	1.01724	-2.58753	4.15145e-11	5.64447e-09
AL158166.1	0.166637	1.20212	2.85079	3.48473e-07	2.97536e-06
NARF-IT1	0.225835	0.525251	1.21774	0.00139937	0.00346803
GATA3	42.1348	86.2903	1.03419	0.0050496	0.0104116
CHAF1B	1.13174	4.17156	1.88205	1.57873e-09	4.91639e-08
AC007785.1	0.112854	1.78861	3.98631	1.75991e-05	8.01095e-05
SYNGR4	0.027337	0.359393	3.71664	2.41649e-07	2.17879e-06
HSPB8	154.544	21.6403	-2.83622	2.71451e-09	7.07394e-08
SLC5A3	2.00171	4.28291	1.09736	0.000100494	0.000357115
ZKSCAN2-DT	0.351778	0.907166	1.3667	4.74868e-06	2.62521e-05
ASF1B	3.75943	17.6937	2.23465	3.96322e-10	2.07136e-08
OSBPL10	6.68415	2.05792	-1.69956	2.34187e-07	2.12581e-06
AC116348.1	0.107254	0.501081	2.22401	0.00402763	0.00859242
AC004449.1	0.0697718	0.264897	1.92472	3.09723e-05	0.000129515
IGIP	5.44125	2.65704	-1.03412	1.75193e-05	7.97658e-05
HHIP-AS1	1.66923	0.408939	-2.02922	3.36997e-06	1.95494e-05
MND1	1.24918	3.58048	1.51918	1.89557e-07	1.79176e-06
ZC3HAV1L	0.896609	2.26902	1.33952	4.07597e-05	0.000163798
INCENP	3.16273	7.77147	1.29702	1.35558e-07	1.36673e-06
AC116407.2	0.304863	0.864637	1.50393	6.48614e-05	0.000244229
AC010789.1	0.0622376	1.43372	4.52583	1.13163e-06	7.79471e-06
AC110285.6	0.0870739	1.18625	3.76803	6.86033e-10	2.96003e-08
PRKAG2-AS1	1.60764	0.747685	-1.10445	9.17055e-08	9.98778e-07
MIR621	4.95739	12.16	1.29449	7.47135e-07	5.54312e-06
AL158166.2	0.0672485	0.257074	1.93461	0.0125823	0.0229451
CLPSL2	0.00770353	0.24476	4.98971	1.18251e-05	5.68762e-05
COL10A1	0.0535561	6.9372	7.01716	6.85575e-08	7.88694e-07
RHBDD3	4.87038	10.8682	1.15801	2.23322e-09	6.24471e-08
ATP2A1-AS1	0.993412	2.88516	1.53818	7.33505e-06	3.7893e-05
MIR647	2.26529	7.67958	1.76133	9.67789e-07	6.84995e-06
ZNF835	0.565019	0.217482	-1.3774	8.87565e-05	0.000320868
AL021407.1	0.140428	0.605463	2.1082	0.00114424	0.00291863
LINC00641	3.40846	0.984257	-1.79201	8.89131e-08	9.756e-07
PCNPP1	0.137126	0.356247	1.37738	3.07704e-06	1.81345e-05
AC010531.6	0.558465	1.82338	1.70707	9.46074e-08	1.0249e-06
AC118553.1	0.469744	0.963036	1.03572	6.04029e-06	3.20969e-05
RGS17	0.290631	0.613297	1.0774	0.0215823	0.0365674
ZNF32-AS1	0.242208	0.656939	1.43951	0.000176336	0.000580064
MANF	22.737	48.6552	1.09755	3.72006e-08	4.8845e-07
SPDYE6	0.125199	0.335778	1.42328	8.6631e-06	4.35081e-05
FZD5	1.68895	4.00308	1.24498	0.000443829	0.0012883
PAX8	0.863896	1.74849	1.01718	0.00341596	0.00743978
STARD8	2.40552	1.03155	-1.22154	1.09301e-07	1.15344e-06
HTR2C	0.0984295	0.459719	2.22359	0.000941704	0.0024778
PRSS8	7.14174	34.0209	2.25207	6.78422e-07	5.11009e-06
TMEM97	23.8314	56.8151	1.25341	0.0101847	0.0191133
AL589843.1	1.40052	0.572642	-1.29026	2.49385e-07	2.23992e-06
AC104667.2	0.108822	0.534849	2.29716	3.87828e-05	0.000157371
SDC2	29.7522	10.2465	-1.53787	4.20778e-07	3.47647e-06
TRAIP	1.08406	3.5734	1.72085	7.45572e-10	3.11563e-08
JAM2	5.94473	1.06176	-2.48516	5.91538e-12	2.77476e-09
HDGF	59.3717	118.875	1.0016	1.67705e-08	2.6554e-07
EGR3	21.9725	1.94095	-3.50086	8.99837e-12	3.18559e-09
TMEM238L	14.1666	4.58411	-1.62777	0.00824519	0.0159473
SMAD9	3.08312	1.21489	-1.34356	9.86455e-07	6.94256e-06
CLEC10A	4.95906	1.52486	-1.70139	5.38727e-08	6.53825e-07
GHR	1.8465	0.41604	-2.15	6.31543e-10	2.80133e-08
AC024361.1	0.336508	0.700065	1.05685	0.00139486	0.00345793
PYDC1	0.0450011	0.271268	2.59169	0.0207319	0.0353072
CCL21	31.2784	14.5868	-1.1005	0.000247122	0.00077709
BHLHA15	0.21733	0.441319	1.02194	0.0153353	0.0272014
KLF2	50.1027	7.89013	-2.66677	4.60349e-12	2.64326e-09
CALML6	0.124021	0.296455	1.25723	0.00923408	0.0175677
TK1	12.3386	54.9247	2.15428	1.83545e-09	5.42339e-08
NALT1	2.29869	1.10847	-1.05224	0.00181571	0.00433217
AC008731.1	0.0928707	0.250069	1.42903	0.0149264	0.0265816
SLC31A2	0.415069	0.847232	1.02941	0.0083184	0.0160674
TFAP4	1.10438	2.69436	1.28671	2.5052e-09	6.70543e-08
RLN2	0.102174	0.517477	2.34046	0.00039853	0.00117536
AC106782.2	1.68837	3.52459	1.06182	0.000262839	0.000819074
KIAA1841	0.916122	2.26694	1.30713	7.84498e-09	1.52219e-07
RPL12P25	0.115727	0.329175	1.50813	0.000423627	0.0012377
TIGD2	2.09602	4.63399	1.1446	1.76977e-06	1.14071e-05
AC020594.1	0.261245	0.662477	1.34246	0.00123161	0.00310748
THRA	11.1196	4.15526	-1.42009	1.2749e-07	1.29864e-06
SCARNA8	0.0595687	0.384174	2.68913	0.000299196	0.000915794
PARVA	20.3336	7.63801	-1.41259	3.32472e-05	0.000137405
CSAG1	1.0813	8.39348	2.9565	0.000740949	0.00201303
AC006449.3	0.0458054	0.22057	2.26765	0.00756031	0.0148063
LMCD1	12.7915	3.76497	-1.76447	8.0689e-07	5.87493e-06
SIX4	0.577442	1.90062	1.71872	1.48593e-07	1.47594e-06
HES6	1.4937	8.05901	2.43172	5.14898e-05	0.000200229
LRRC45	4.39801	12.9551	1.5586	5.67423e-10	2.63529e-08
PDE1C	1.80862	0.16899	-3.41988	7.25642e-09	1.44382e-07
AC134312.5	0.142135	0.60384	2.0869	0.0224386	0.0378168
BLCAP	14.1564	28.4925	1.00913	2.23524e-05	9.8128e-05
ACBD7	0.286245	0.694284	1.27827	0.0261118	0.0430891
CKS1B	5.83138	17.3908	1.57642	2.80933e-09	7.27057e-08
NCAPG	1.11158	5.35199	2.26746	1.65374e-09	5.07013e-08
SPRY1	28.8122	8.21831	-1.80976	3.04016e-10	1.76057e-08
AC025766.1	0.055929	0.208548	1.89871	0.000275665	0.00085408
HOXB-AS3	0.306265	1.20289	1.97365	3.01161e-05	0.000126575
ADAMTS15	3.2162	1.36443	-1.23706	2.68292e-06	1.61604e-05
AC114730.3	0.254257	0.597609	1.23292	0.000840414	0.00224593
NDC1	4.40505	10.1354	1.20217	5.93329e-09	1.24945e-07
CEND1	0.980182	0.400798	-1.29018	5.28611e-06	2.87576e-05
AL024498.1	0.105232	0.351344	1.73931	4.40847e-08	5.59277e-07
CYTOR	1.98502	4.91318	1.3075	0.00230689	0.00531615
USP21	5.62442	12.7715	1.18315	1.23454e-08	2.12122e-07
SGPL1	13.9738	28.1197	1.00885	0.000238981	0.000755647
ELF3-AS1	0.806648	2.39084	1.56751	4.71375e-05	0.000185691
SERINC2	60.8495	158.69	1.3829	3.01275e-05	0.000126575
LINC01833	0.236757	1.50938	2.67248	0.00191485	0.00452896
FNDC10	3.26416	10.3159	1.66008	1.1434e-05	5.51083e-05
HIST1H2BK	16.3951	73.539	2.16524	2.03432e-07	1.89712e-06
SLC37A4	2.18084	5.75346	1.39955	1.28023e-09	4.29713e-08
AP006621.2	0.563093	1.39509	1.30892	0.000938943	0.00247106
AL138789.1	0.0477686	0.477298	3.32076	0.00883209	0.0169237
AC112721.2	0.0316449	0.664483	4.39219	2.20538e-05	9.69757e-05
UST	7.4717	3.50781	-1.09086	3.94581e-05	0.000159456
PRKN	1.5139	0.279618	-2.43675	3.26869e-10	1.8473e-08
PSORS1C2	0.588482	20.7934	5.14298	0.000620289	0.00172414
AL121917.2	0.125615	0.383461	1.61007	0.00177792	0.00425824
IGSF9	1.94337	9.38917	2.27244	8.0689e-07	5.87493e-06
NSD2	2.48469	5.44616	1.13217	8.98385e-08	9.8288e-07
AC011933.3	0.123032	0.28045	1.18871	0.0100174	0.0188317
SNORD15B	0.442094	4.13868	3.22675	0.00206587	0.00483134
CSPG4	16.9093	5.90559	-1.51766	0.000218776	0.000700018
AC136475.1	0.501548	0.214285	-1.22685	2.5963e-05	0.000111763
SAMD5	1.57394	0.774527	-1.023	0.00109438	0.00281015
CPT1B	0.383511	1.08013	1.49386	1.08571e-05	5.27889e-05
KCND2	0.266502	0.652013	1.29076	0.0244	0.0406085
FAM131C	0.267071	0.785382	1.55617	0.000570821	0.00160273
SYNE3	0.774844	0.353657	-1.13156	3.5916e-06	2.06083e-05
HSPB9	0.114618	0.288626	1.33236	8.08412e-05	0.000295965
SPATC1L	2.78076	6.08483	1.12974	0.000228669	0.000727578
RN7SL130P	0.158608	0.334287	1.07562	0.00866534	0.0166432
RNU6-1099P	0.170512	0.558938	1.71282	0.000447228	0.00129696
HAPLN1	0.140753	0.639395	2.18355	0.00530468	0.010873
LINC01232	0.384748	1.32897	1.78832	1.01698e-07	1.08975e-06
AL354892.3	0.210362	0.431399	1.03615	7.53379e-05	0.00027848
GPRIN1	0.35451	2.65716	2.90599	2.03656e-09	5.8428e-08
AC096759.2	0.0223809	0.296766	3.72899	0.000218152	0.000698497
ZWINT	4.22294	22.7149	2.42732	7.39962e-11	7.67067e-09
AC005180.2	32.5163	1.32025	-4.62228	7.63217e-11	7.74067e-09
DSC1	0.0792428	0.373111	2.23525	0.00410366	0.0087308
CCNB1	6.81036	30.2696	2.15207	1.59716e-09	4.94515e-08
MEX3A	1.27104	7.83701	2.6243	1.82955e-08	2.83233e-07
AL031602.1	0.149342	0.542718	1.86158	0.00153614	0.00375885
RAPSN	0.094254	0.595307	2.65901	0.000145035	0.000490268
CRISPLD2	30.7942	8.01607	-1.94169	6.34587e-09	1.31421e-07
VPS9D1-AS1	1.23462	4.27004	1.79019	3.2976e-05	0.000136524
CHPF	23.0508	50.8994	1.14283	4.54053e-06	2.52352e-05
AL121917.1	0.176563	0.457316	1.37301	2.92706e-05	0.0001235
IL17RD	2.32735	1.01887	-1.19172	0.00367141	0.00792689
UHRF1	0.960101	5.72973	2.57721	6.95151e-11	7.44979e-09
AC073073.1	0.213027	0.672183	1.65781	8.6684e-07	6.24838e-06
PCSK1N	0.305058	3.20887	3.39491	0.000721263	0.00196685
DDR2	11.3594	2.09517	-2.43874	9.16456e-09	1.7127e-07
ALPP	0.026966	5.27426	7.61168	2.40459e-06	1.47587e-05
RNASEH2A	7.71575	23.1867	1.58742	1.73223e-09	5.19198e-08
ALOX12P2	0.297676	0.891189	1.58199	0.00120021	0.00303959
RSAD2	1.32031	6.50329	2.30029	0.00250107	0.00569718
TSACC	0.151717	0.677947	2.15979	1.11914e-09	3.94707e-08
AC104971.1	0.0904906	0.212013	1.22831	0.0046523	0.00970225
SMPDL3B	1.14837	4.12641	1.8453	3.92982e-05	0.000159015
AP001347.1	0.891196	0.381419	-1.22437	0.000895939	0.00237237
LINC02601	0.0946884	0.239351	1.33787	0.00113061	0.002888
MICB	0.894485	3.60451	2.01067	4.07602e-06	2.30634e-05
SCN4B	2.49544	0.557592	-2.16201	1.37303e-09	4.54361e-08
AL031736.1	0.102755	0.632026	2.62078	0.000720183	0.00196578
ARHGEF37	6.43661	1.99161	-1.69237	2.53263e-05	0.000109492
AP002907.1	0.263495	0.57343	1.12184	0.00443974	0.00931489
DUSP23	27.0895	57.7274	1.09152	4.41986e-06	2.46522e-05
LINC02178	0.886027	2.71558	1.61584	0.0134682	0.0243241
GRB14	0.173037	0.627532	1.85861	0.00923464	0.0175677
MARVELD3	1.3711	3.6782	1.42367	9.95902e-07	6.9933e-06
AC009533.1	0.740011	1.90718	1.36582	1.70495e-06	1.10653e-05
AP000553.2	0.0916092	1.13063	3.62549	4.24648e-08	5.4424e-07
LDHAP3	0.265717	0.626376	1.23714	0.0120798	0.0221688
AC002401.4	0.569673	3.03285	2.41247	0.0162442	0.0285839
MRPL40P1	0.0255351	0.400124	3.9699	5.63848e-08	6.75142e-07
AL390729.1	0.0582465	0.697034	3.58099	0.00112812	0.00288338
AP001486.2	1.15514	0.459012	-1.33146	5.75348e-07	4.46638e-06
CATSPERB	0.172206	0.500073	1.538	0.0013591	0.00338208
KRT18P8	0.0423209	0.274316	2.6964	1.12411e-07	1.17764e-06
RNASE7	0.348343	3.25911	3.2259	0.000231088	0.000733904
G2E3-AS1	0.0525672	0.590836	3.49052	2.29198e-05	0.000100267
AC020891.2	0.216526	0.66327	1.61506	0.00160064	0.00389126
AC010359.1	0.277392	0.592402	1.09465	0.00012748	0.00043824
SYCE3	0.340789	0.707402	1.05365	0.000272544	0.000844987
SLC6A11	0.516879	1.66969	1.69169	0.0218493	0.0369631
SPRR2D	6.69554	16.4851	1.29989	0.00284068	0.00635958
MT1P1	0.182387	0.517135	1.50354	8.26931e-05	0.000301925
MXD3	0.992094	2.70294	1.44598	4.09333e-08	5.2641e-07
CIP2A	0.939671	3.42503	1.86589	3.4108e-09	8.3221e-08
AC232271.1	0.379894	0.832393	1.13167	4.82888e-05	0.00018943
KRTCAP2	4.12744	8.29222	1.00651	2.64195e-08	3.7412e-07
AC138207.4	0.363648	0.874503	1.26592	1.76679e-05	8.03255e-05
CCM2L	1.79437	0.871555	-1.04181	2.25399e-05	9.88814e-05
AC009268.2	0.112512	0.30696	1.44797	0.000378361	0.00112418
CD99P1	0.518023	1.077	1.05593	8.00768e-06	4.07287e-05
AC011468.4	0.0881552	0.24678	1.48511	0.0170052	0.029703
AC008764.8	0.167766	0.337867	1.01001	0.000312853	0.000951697
PJA2	37.6697	12.7616	-1.5616	1.97397e-08	3.00629e-07
AC022893.1	1.77222	0.33096	-2.42083	0.000338639	0.00102103
AC104534.1	0.211079	0.504328	1.25658	0.021794	0.0368809
C10orf143	0.950429	0.43027	-1.14334	2.64195e-08	3.7412e-07
PHETA1	3.41379	7.08707	1.05381	1.60551e-08	2.57912e-07
SRF	45.7378	16.597	-1.46247	2.16874e-11	4.47166e-09
ZDHHC20-IT1	0.14663	0.352231	1.26434	0.00794061	0.0154378
PLCD4	3.53378	0.578587	-2.6106	2.39274e-09	6.52545e-08
TACR1	1.08437	0.239757	-2.17721	1.4988e-10	1.20726e-08
AC139100.2	0.448433	0.933877	1.05834	0.0226735	0.0381271
AP006287.2	0.0878308	0.258731	1.55865	0.00092657	0.00244174
MCAM	43.7821	13.6044	-1.68627	6.23428e-05	0.000235644
ZNF710-AS1	4.96773	1.1632	-2.09449	1.11627e-06	7.70591e-06
E2F5	0.859354	1.89175	1.1384	3.06274e-05	0.000128244
KCNH2	6.12051	1.28152	-2.2558	7.01754e-09	1.40673e-07
SNHG9	5.12498	10.923	1.09175	0.00317679	0.00700014
KIF11	2.47958	9.19841	1.89129	5.86711e-09	1.24389e-07
ATXN1	3.40743	1.64984	-1.04636	7.18883e-07	5.36105e-06
RNF128	13.547	29.2236	1.10916	0.0157836	0.0278727
IL1RAP	0.981721	2.32872	1.24615	0.0168709	0.0294958
ABRACL	21.7195	47.7672	1.13703	1.83696e-06	1.17634e-05
AL161452.1	0.141516	0.38399	1.44011	4.3802e-06	2.45045e-05
KCNK2	0.833902	0.175172	-2.2511	4.56091e-09	1.03729e-07
AC010973.2	0.347124	0.971452	1.48469	9.65828e-08	1.04029e-06
FBXO43	0.123696	0.327759	1.40584	7.3998e-06	3.82065e-05
AC112907.2	0.2954	0.854203	1.53191	0.00107997	0.0027785
EXO1	0.663097	3.49187	2.39671	1.00113e-09	3.6545e-08
PDE1A	3.27911	0.524828	-2.64339	6.24083e-10	2.7814e-08
MIR222HG	4.64411	1.59802	-1.53912	0.0014692	0.00361482
PPP2R3B	1.44409	3.147	1.12382	2.11796e-07	1.95953e-06
AL669831.4	0.142873	0.288172	1.0122	0.00110162	0.00282533
AL358072.1	0.182722	0.398571	1.12518	0.00123161	0.00310748
DEFB126	0.0656956	0.818146	3.63849	0.000115063	0.000400916
CAND2	2.04537	0.967939	-1.07937	0.000140718	0.000477535
CST1	0.169957	40.6624	7.90238	2.15221e-09	6.07247e-08
HJURP	1.06853	6.84643	2.67972	2.83657e-11	4.88281e-09
PMFBP1	0.142379	0.295721	1.0545	0.00804646	0.0156144
OLR1	1.29026	9.22849	2.83843	0.0049622	0.010263
CYR61	459.513	68.6652	-2.74246	3.75166e-11	5.36014e-09
AC011933.1	0.119354	0.262	1.13432	0.0110909	0.0205793
ANO9	2.79352	5.67344	1.02214	0.000496659	0.00142142
AP001160.2	0.154928	0.371489	1.26172	0.000416391	0.00122039
MELTF-AS1	0.880195	3.3031	1.90792	1.62311e-08	2.59186e-07
IGFL2	0.0273229	2.7454	6.65076	1.28107e-06	8.68381e-06
AC011503.2	0.290537	1.44277	2.31204	4.13696e-08	5.31295e-07
LINC02004	0.157282	0.60875	1.9525	0.00766788	0.0149758
KLHL41	4.43073	0.202581	-4.45098	2.90735e-09	7.44221e-08
FDX2	1.15424	2.49593	1.11264	7.33779e-09	1.45692e-07
AC022784.1	0.0401655	0.477816	3.57243	0.0024816	0.00566176
AC093620.1	0.242278	0.567239	1.2273	0.000126512	0.000435311
TCEAL3	22.4484	11.0782	-1.01889	7.8686e-06	4.01628e-05
AL356417.2	0.0541585	0.23812	2.13643	0.0286552	0.0467123
NRP2	8.30728	3.16951	-1.39012	0.00058294	0.00163201
AC145285.6	0.187619	0.458316	1.28854	1.96047e-06	1.24188e-05
ADCY5	8.84149	1.13642	-2.95979	3.7995e-11	5.36014e-09
KRTAP2-3	0.00896382	0.399629	5.47841	0.00413747	0.0087848
IGFL3	0.053702	0.620837	3.53117	0.000542072	0.00153384
KIAA0895	0.501831	1.01754	1.01981	0.0105202	0.0196466
MEIS3P2	1.39242	0.377044	-1.88479	4.86301e-05	0.000190729
TDRKH	1.38025	3.83622	1.47475	1.6734e-06	1.08983e-05
AC010894.3	0.169006	0.749213	2.1483	0.00246573	0.0056317
MKRN2OS	1.0033	3.52498	1.81286	1.12386e-05	5.43617e-05
AC114956.2	0.356888	0.759188	1.08899	0.000837582	0.00223904
IGFL1P1	0.256065	3.95961	3.95078	5.83391e-05	0.0002228
TCEAL7	6.889	1.4009	-2.29794	2.49666e-11	4.75155e-09
LINC01481	0.432403	1.18051	1.44895	9.22703e-07	6.58778e-06
AL441992.1	1.94635	4.31632	1.14903	1.55595e-05	7.19782e-05
C1orf112	0.80635	2.67383	1.72943	5.24361e-09	1.14803e-07
PDCD5P1	0.0859111	0.28058	1.70749	0.000519742	0.00147936
NHLRC1	0.979425	2.00055	1.03039	0.00116907	0.00296744
CXCR1	0.793448	0.274153	-1.53316	0.00028392	0.000874744
VN1R81P	0.764515	1.72134	1.17091	0.00420995	0.00890681
ATAT1	2.5023	5.67962	1.18254	4.15014e-06	2.34404e-05
AC006449.5	0.279662	0.878155	1.65079	4.58144e-06	2.544e-05
SKP2	3.49616	13.6388	1.96387	9.49199e-11	8.94966e-09
MIR548AR	0.167034	0.512653	1.61784	0.00555062	0.0113092
SQLE	6.88734	21.4433	1.63851	2.38932e-07	2.1574e-06
EPYC	0.0171458	0.968736	5.82018	0.00510925	0.0105196
DPF1	0.0770907	0.333384	2.11256	7.24356e-05	0.000268917
KISS1	0.894946	9.08117	3.34301	0.00469236	0.00976951
TRPM2-AS	0.278238	2.13937	2.94279	7.6519e-05	0.000282439
ADAMTSL1	0.791147	0.318327	-1.31344	2.16102e-07	1.98859e-06
AC007285.2	0.115404	0.247983	1.10354	0.0243686	0.0405776
AC109460.1	0.108386	0.300515	1.47125	1.07074e-07	1.1344e-06
OLFML1	6.28479	1.42566	-2.14023	1.96725e-09	5.69621e-08
ZNF540	0.647401	0.287825	-1.16947	1.18664e-07	1.22605e-06
AC245884.8	0.383714	1.07913	1.49177	2.29193e-05	0.000100267
LRRC61	3.27066	8.40206	1.36116	2.86054e-06	1.71094e-05
PDZRN3	12.4546	1.87636	-2.73067	5.60704e-10	2.61703e-08
KRT83	0.0773804	0.739494	3.2565	0.0272389	0.0447181
SMOC2	47.3837	7.26942	-2.70448	2.53496e-10	1.61232e-08
CGB8	0.00654159	1.13118	7.43397	0.000279859	0.000864787
PSG4	0.0144947	0.585863	5.33697	0.00575734	0.0116582
MAD2L1	1.42403	5.49244	1.94747	3.11359e-09	7.81021e-08
VCL	54.8305	18.6234	-1.55786	5.44547e-05	0.000209845
BUB1	1.71134	6.66002	1.9604	4.73793e-09	1.0621e-07
AC005840.2	0.577102	1.38839	1.26652	2.27288e-05	9.95938e-05
DGCR6	0.256419	0.619699	1.27306	0.0179324	0.0311024
C1R	105.302	52.404	-1.00678	4.04305e-05	0.000162719
DIAPH3	0.73696	1.81469	1.30006	7.54367e-07	5.5769e-06
TMEM246	4.65866	2.04577	-1.18727	1.00436e-05	4.94875e-05
C11orf80	2.36721	5.57449	1.23565	1.48159e-06	9.84389e-06
WISP1	0.64914	3.21333	2.30747	0.0223412	0.0376629
S100A7A	0.167886	3.11636	4.21431	0.0010687	0.00275629
PTPRG-AS1	0.105293	0.339644	1.68962	0.00070673	0.00193286
STARD9	1.21471	0.301921	-2.00837	3.17009e-08	4.30393e-07
ZIC2	0.300065	1.78662	2.57389	7.04474e-05	0.000262523
GGCT	20.9119	50.2717	1.26542	4.84848e-08	6.0008e-07
XPOT	7.24855	14.9437	1.04377	5.00438e-08	6.14913e-07
CMA1	6.70368	0.853566	-2.97338	5.79772e-09	1.2342e-07
AC005682.1	1.39027	0.655182	-1.0854	1.07631e-05	5.24027e-05
LPAR1	10.3459	3.91583	-1.40167	8.39076e-10	3.30747e-08
RDM1	0.17539	1.45148	3.04889	8.39052e-10	3.30747e-08
GPRASP1	6.03777	0.886776	-2.76738	2.11208e-10	1.47319e-08
AC105118.1	0.0327359	0.304813	3.21898	0.00091983	0.00242733
ZNF92P3	0.0624208	0.219484	1.81401	0.0012814	0.0032139
ADAP1	1.2635	2.82635	1.16152	0.00206077	0.00482062
HSD17B7	1.4702	3.1246	1.08766	1.81993e-06	1.16584e-05
ZNF525	0.740232	2.14079	1.53209	1.48961e-09	4.73721e-08
RUNDC3A	0.176876	0.680449	1.94375	0.0137923	0.0248139
PPM1N	0.873996	3.22319	1.88279	0.00928528	0.0176497
SLC38A1	10.646	21.5749	1.01904	4.38033e-06	2.45045e-05
AC026202.2	0.126542	0.344873	1.44645	0.00289862	0.00646619
SCGB3A2	0.0221921	0.260721	3.55439	0.00170488	0.00411484
HIST1H2BJ	0.602202	6.33555	3.39515	2.39274e-09	6.52545e-08
AC004233.2	0.011509	0.323981	4.81508	9.03053e-06	4.50638e-05
TRMT112P6	0.172586	0.367033	1.08859	0.00102148	0.00265678
AL121832.3	0.0563372	0.327256	2.53826	3.34853e-10	1.88109e-08
ZFP2	0.808017	0.331976	-1.28331	2.73256e-06	1.64278e-05
TACC3	4.27457	17.0513	1.99603	9.89434e-10	3.63302e-08
YTHDF3-AS1	1.02587	2.09736	1.03173	6.95777e-06	3.62534e-05
FIGNL1	1.33105	3.45587	1.37648	5.111e-08	6.25964e-07
RPL37P6	0.98639	2.24622	1.18727	0.000650982	0.00179888
DUSP2	113.987	20.4895	-2.47591	0.00416058	0.00882389
SGCB	15.9736	6.14869	-1.37734	6.13616e-05	0.000232357
CLDN14	0.0886474	0.24221	1.45011	0.0035203	0.00764498
AL355388.2	0.160277	0.375071	1.22659	4.82888e-05	0.00018943
CNIH2	0.312511	1.66356	2.4123	2.91783e-07	2.56067e-06
CMTM4	2.34371	4.72164	1.01049	0.000655471	0.00180835
MIR4664	0.938252	2.77335	1.56358	0.000135926	0.000463369
TIMM8BP2	0.20833	0.441999	1.08517	0.00152451	0.00373425
ATP1A2	18.2931	0.886809	-4.36653	7.29315e-12	3.11003e-09
TRIM17	0.491347	2.76051	2.49012	4.60128e-05	0.000181832
KCNA5	1.32565	0.158119	-3.06762	3.08919e-11	4.93093e-09
AC023908.3	0.0641666	0.239547	1.90042	7.22334e-07	5.38464e-06
MIR27B	1.87642	0.918274	-1.03098	3.21049e-07	2.78237e-06
AP000442.2	0.395889	0.874325	1.14307	6.92718e-06	3.61241e-05
SNORD73B	0.191141	0.629547	1.71968	0.0095911	0.0181396
FOS	917.618	120.901	-2.92407	2.24475e-10	1.52495e-08
AC002470.1	0.582655	1.75848	1.59361	1.61197e-06	1.05751e-05
HIST1H1C	21.7542	134.951	2.63306	9.47419e-09	1.74279e-07
MIR4326	0.352549	0.791544	1.16684	0.00438912	0.00922001
CBX8	1.02993	3.36442	1.7078	2.28279e-11	4.60559e-09
NPTX1	0.763968	0.283359	-1.43088	2.37213e-08	3.46391e-07
ACTA2	864.048	105.316	-3.03638	7.72501e-10	3.14413e-08
SLC25A35	1.36326	2.79417	1.03536	0.00576722	0.0116719
AL020997.1	0.141942	0.401475	1.50001	5.64686e-06	3.03674e-05
HOXC-AS2	0.0273136	0.215774	2.98183	8.24122e-05	0.000301423
AC092123.1	0.206358	0.428981	1.05577	3.75792e-05	0.000152951
CMTM8	3.33112	7.32276	1.13638	0.000377015	0.00112036
SH3D19	14.012	5.72458	-1.29142	1.1434e-05	5.51083e-05
FGF11	0.0649339	0.304383	2.22884	1.50388e-05	6.99158e-05
HDAC4	3.28875	0.968084	-1.76433	6.85583e-08	7.88694e-07
AC018755.3	0.156079	0.472224	1.59719	7.95846e-05	0.000291656
AL353807.3	0.130212	0.27215	1.06354	1.26768e-05	6.02621e-05
AC096537.1	0.125813	0.992189	2.97934	0.0017221	0.00414944
PRIMA1	3.07415	0.407592	-2.91499	1.21937e-11	3.59596e-09
C10orf55	0.291915	0.797549	1.45002	0.00239473	0.00549429
SNORD72	0.407781	1.24245	1.60732	0.000901378	0.00238642
AP006284.1	0.438928	1.80353	2.03877	7.71308e-05	0.000284271
ARHGAP39	1.02986	3.69502	1.84313	7.20395e-12	3.11003e-09
LMNB1	6.02668	21.0697	1.80573	4.23168e-09	9.79025e-08
C14orf132	2.45912	1.14232	-1.10617	8.73904e-06	4.38073e-05
PPIAP39	0.895906	0.268299	-1.73951	3.3057e-06	1.92564e-05
COLGALT1	17.3863	34.887	1.00474	4.04541e-07	3.36454e-06
EPHX2	6.7183	2.42656	-1.46919	1.42186e-09	4.63167e-08
NEGR1	5.59784	0.395429	-3.82338	2.80064e-11	4.86559e-09
GEM	47.7413	6.37841	-2.90397	6.36845e-11	7.2419e-09
AC016737.1	0.15225	0.513188	1.75305	7.1126e-06	3.6978e-05
CSDC2	4.48247	1.30472	-1.78055	6.09867e-07	4.67444e-06
LRRC37A17P	1.56813	0.516858	-1.6012	0.000247906	0.000778618
AC005730.3	0.0634396	0.217496	1.77754	0.000911604	0.00241111
CYP27A1	12.758	5.78984	-1.13981	6.4639e-07	4.92216e-06
PDIA3P2	0.0851385	0.245904	1.53021	0.0145346	0.0259676
KRT9	0.0610572	0.695036	3.50885	6.88131e-05	0.000256994
FAM107A	14.3509	0.986305	-3.86297	1.15702e-12	1.81509e-09
ABCB9	0.300656	0.7383	1.29609	6.5625e-09	1.34424e-07
CYP4A22-AS1	0.0782276	0.325313	2.05608	9.2654e-07	6.61265e-06
PNPLA1	0.0669925	0.406651	2.60172	6.74641e-05	0.000252857
FAM124A	1.10742	0.37771	-1.55185	5.64264e-07	4.40953e-06
HPDL	0.524169	2.32452	2.14883	0.00841087	0.0162259
FAM129C	0.783494	0.329874	-1.24801	0.00566867	0.0115022
GSDMB	4.76226	9.55889	1.0052	0.00761085	0.0148784
AP003068.4	0.165378	0.678703	2.03701	0.00132234	0.00330507
LEPR	2.58899	0.679322	-1.93022	3.99869e-09	9.40194e-08
CDX2	0.0703769	0.739358	3.3931	0.0181976	0.0315142
IRF9	1.07316	2.38013	1.14918	4.17625e-05	0.00016747
AL031963.3	0.272975	0.713256	1.38565	1.39284e-05	6.53999e-05
AC025178.1	0.164228	0.46686	1.50729	9.40498e-07	6.67674e-06
GRHL2	7.27296	15.0462	1.04879	9.0163e-05	0.000325145
PODN	27.2646	5.92669	-2.20173	3.72006e-08	4.8845e-07
FOXD2-AS1	0.547179	1.90603	1.80048	8.89131e-08	9.756e-07
SH3GL1P1	0.085455	0.25026	1.55019	2.17084e-06	1.355e-05
ERRFI1	62.6652	30.535	-1.0372	0.00291711	0.00649968
UTAT33	0.171028	0.410849	1.26437	0.000152906	0.000512913
VAV2	5.51469	12.2381	1.15003	1.97129e-05	8.81279e-05
INSYN1	1.92266	0.451859	-2.08916	7.84488e-09	1.52219e-07
HID1	6.56474	15.3487	1.22531	0.00580041	0.0117277
AP005899.1	0.294139	0.592824	1.0111	0.00446542	0.00935731
XRCC3	1.25064	3.01141	1.26778	1.71398e-08	2.69116e-07
AC020904.2	0.106775	0.262608	1.29834	0.00476357	0.00990129
CC2D2A	3.81507	1.42467	-1.42108	3.22077e-06	1.88259e-05
DUSP8	4.34998	1.35947	-1.67797	1.89014e-08	2.90694e-07
JUND	232.251	94.7142	-1.29403	2.99426e-06	1.77452e-05
BEST4	0.27163	0.610798	1.16905	0.00216702	0.0050309
AC022211.2	0.275801	0.694706	1.33277	1.67871e-07	1.62359e-06
UBASH3B	1.22319	3.03058	1.30895	0.000837595	0.00223904
GNRH2	0.140511	0.332827	1.24409	0.016525	0.0289963
CCL14	2.20281	0.260473	-3.08014	6.83874e-12	3.05512e-09
SFXN2	0.830264	1.71337	1.04519	3.63745e-05	0.000148595
ENDOU	3.18821	0.329699	-3.27352	1.80126e-06	1.15783e-05
CENPO	1.04774	3.1165	1.57264	1.99009e-09	5.7358e-08
IER3-AS1	1.73061	0.688264	-1.33024	4.60128e-05	0.000181832
AL513217.1	1.41828	0.258595	-2.45538	8.51284e-06	4.28698e-05
C9orf116	1.01931	2.69665	1.40357	5.8297e-06	3.11987e-05
ATF3	160.025	21.1414	-2.92015	1.69254e-09	5.14703e-08
RGMA	1.17009	0.497531	-1.23375	2.25258e-06	1.39535e-05
AC022390.1	0.113942	0.347403	1.60831	0.00357826	0.00775635
SELE	14.7565	2.86055	-2.36698	2.61807e-05	0.000112461
ESR1	2.4269	0.408273	-2.57151	1.39775e-07	1.40321e-06
PROK1	0.590467	0.260078	-1.18291	0.000136311	0.000464513
IL22RA1	0.94326	2.56265	1.44191	1.95139e-06	1.23738e-05
SLC6A12	0.131777	0.356873	1.43732	0.0244001	0.0406085
TNFSF8	0.888261	0.44113	-1.00978	7.53353e-05	0.00027848
CNKSR1	5.16077	12.5814	1.28563	1.76977e-06	1.14071e-05
PPP1R35	9.21474	20.9128	1.18237	1.91077e-08	2.92667e-07
TMSB10	1497.02	3087.56	1.04437	9.40502e-07	6.67674e-06
RGS19	5.25325	11.6942	1.15451	2.74844e-07	2.43135e-06
IGDCC4	1.43576	0.544751	-1.39814	3.40134e-06	1.96852e-05
RBM24	3.39389	0.514511	-2.72167	1.16723e-11	3.59596e-09
SLAMF9	0.115518	0.557762	2.27154	0.0050302	0.010383
ZNF106	9.03774	3.94065	-1.19753	0.000232059	0.000735993
LINC00337	0.0836537	0.417344	2.31874	7.37505e-08	8.36631e-07
SHMT2	10.7724	30.5052	1.50171	9.61057e-11	8.9713e-09
GAS6	38.1098	18.0236	-1.08027	4.87455e-07	3.91361e-06
CNN1	670.652	34.6367	-4.27519	5.68867e-11	6.71299e-09
RDH16	0.201225	0.935089	2.21629	0.000117205	0.000407094
RNU6-925P	0.525518	1.46951	1.48352	0.000235039	0.00074456
MIR99AHG	0.779377	0.198751	-1.97136	1.24713e-08	2.14073e-07
FANCA	0.532124	2.51999	2.24359	4.59284e-11	5.9367e-09
AL138995.1	0.511197	0.18596	-1.45889	1.14269e-08	2.00439e-07
CXCL2	23.8495	5.78528	-2.0435	1.06711e-05	5.20192e-05
AC084018.1	1.34555	2.73336	1.02248	0.00428543	0.00903356
LINC01134	0.0582021	0.240958	2.04964	1.23545e-05	5.89993e-05
AL512363.1	0.391808	1.5542	1.98795	0.00268081	0.00605004
POP7	18.0507	40.3927	1.16204	5.60704e-10	2.61703e-08
AC136475.3	0.891883	4.74937	2.41281	0.000557238	0.00157296
TMEM191C	0.0401598	0.242343	2.59323	8.62925e-07	6.22496e-06
SNRPF	11.3458	25.2219	1.15252	8.67023e-09	1.63662e-07
KRT7	185.346	554.558	1.58112	9.59365e-05	0.00034326
RNU1-106P	0.42419	1.51771	1.83911	1.28945e-05	6.11187e-05
AL122125.1	0.28038	0.685026	1.28877	0.00141314	0.00349298
AC009065.5	0.269776	0.916214	1.76392	0.000431348	0.00125747
TTF2	1.39594	3.1129	1.15703	1.24818e-08	2.14073e-07
DNAJB11	8.05343	17.3967	1.11113	4.97639e-10	2.42525e-08
YDJC	7.04525	21.8324	1.63175	7.81686e-10	3.16777e-08
TAP2	4.29674	9.86191	1.19862	0.000419427	0.00122677
AC006213.3	0.212126	0.612525	1.52985	7.01408e-05	0.000261537
SORBS1	64.4594	4.13025	-3.96409	3.2589e-09	8.07751e-08
MIR6740	0.0500063	0.229104	2.19582	0.0011629	0.00295536
AC253576.2	0.315645	0.782508	1.3098	0.0027604	0.00620094
AGTR1	3.89031	0.457221	-3.08892	1.37116e-10	1.14196e-08
OR7E47P	2.04703	0.59635	-1.7793	6.8554e-08	7.88694e-07
LIG1	3.81881	10.4462	1.45178	1.55546e-10	1.23666e-08
TERT	0.056899	0.628044	3.46439	6.55944e-09	1.34424e-07
LRRC26	0.0559012	0.208595	1.89975	0.00480679	0.00998559
SIM2	0.456229	2.12112	2.217	4.73352e-07	3.81836e-06
EDNRA	9.71347	2.79266	-1.79835	9.40502e-07	6.67674e-06
WDR4	3.59659	8.53394	1.24658	2.31164e-09	6.39725e-08
CDO1	2.30901	0.675465	-1.77332	5.84751e-09	1.24255e-07
AC108136.1	0.518061	1.40985	1.44435	0.025617	0.0423743
MIR6728	0.091552	0.343247	1.90658	0.00316307	0.00697646
AL135999.1	0.439471	0.894344	1.02506	0.000385162	0.00114149
OPLAH	2.4655	6.00645	1.28463	7.71317e-05	0.000284271
AKR7A3	0.296564	0.715804	1.27122	0.000125551	0.000432321
MTFR2	0.674921	3.03341	2.16815	5.74221e-10	2.65372e-08
NFIA	10.3302	3.13831	-1.71881	2.6935e-10	1.65157e-08
TEFM	1.26537	2.55896	1.01599	6.02217e-10	2.7162e-08
SNHG20	1.18828	2.43855	1.03714	3.13397e-06	1.84103e-05
RNU5B-4P	0.571771	0.228307	-1.32446	0.000417711	0.00122385
HIST1H4E	0.222999	7.32804	5.03832	4.7899e-09	1.07154e-07
AC138393.3	0.0981502	0.272914	1.47539	0.0012771	0.00320609
DRAXIN	0.0347758	0.296537	3.09205	1.57147e-07	1.54293e-06
HIST1H1D	0.0696346	3.14881	5.49886	2.08939e-08	3.14632e-07
KLF15	3.92141	1.83466	-1.09586	5.10789e-05	0.000198837
FER1L4	7.2955	29.1449	1.99816	0.000616087	0.0017133
REV3L	3.61402	1.5772	-1.19624	2.56259e-06	1.55353e-05
CBWD4P	0.559228	1.15628	1.04799	0.000462989	0.00133573
ABLIM1	27.4704	10.1204	-1.44061	1.3777e-08	2.31007e-07
HIST1H2AB	0.0336794	1.06122	4.97772	5.2852e-05	0.000204635
PALM	7.35679	3.21845	-1.19271	4.59644e-07	3.74319e-06
AC104117.3	0.544307	0.198975	-1.45184	6.41972e-06	3.38042e-05
ZBED6CL	2.05927	5.44355	1.40242	0.000166112	0.000551055
HIPK3	19.505	8.05176	-1.27647	2.87888e-08	4.01013e-07
IFIT3	6.0836	22.5147	1.88787	0.00378289	0.00813785
HOXB6	1.79769	6.02023	1.74367	5.72706e-06	3.07371e-05
AL080317.1	1.30008	3.63167	1.48203	5.55992e-08	6.67867e-07
SDC3	23.9278	11.9371	-1.00324	0.000159988	0.000533569
TMC5	0.828736	1.91811	1.2107	0.0268789	0.0441929
CTSC	8.93729	23.4631	1.39248	0.00061185	0.00170278
RNU6-945P	0.138408	0.365256	1.39999	0.0304459	0.049225
PCOLCE2	16.1048	1.4231	-3.50038	8.59104e-10	3.32358e-08
AC116348.2	0.0883091	0.366099	2.0516	0.00227374	0.00525008
NECAB1	2.97795	0.424228	-2.81141	2.34684e-08	3.43477e-07
AC087301.1	0.0723776	0.244836	1.7582	0.000391746	0.00115844
ZNF25	4.27464	1.99993	-1.09585	1.49117e-05	6.94092e-05
CLSPN	0.449607	1.91591	2.0913	7.37508e-08	8.36631e-07
CCDC134	1.39566	3.25734	1.22274	2.12942e-08	3.1887e-07
SNRPA1	6.06397	12.4109	1.03327	1.47238e-09	4.73054e-08
DIXDC1	9.57312	1.32843	-2.84926	3.6104e-09	8.67374e-08
CDCA7	1.54992	6.24923	2.01149	2.34187e-07	2.12581e-06
FENDRR	14.6127	1.37442	-3.41033	1.10836e-11	3.59596e-09
MNX1-AS1	0.34894	1.96532	2.49371	3.63184e-06	2.07883e-05
U62317.1	0.574413	3.95134	2.78218	3.42097e-05	0.000140824
CLU	201.517	67.7116	-1.57343	1.50372e-08	2.46843e-07
SLC25A19	1.57021	3.24953	1.04928	7.29864e-08	8.30973e-07
AC091153.3	0.123915	0.606393	2.2909	5.55707e-08	6.67867e-07
GRIN2D	0.41262	5.2214	3.66155	9.26666e-09	1.72149e-07
AC079313.2	4.03252	0.276974	-3.86386	4.69748e-07	3.80072e-06
NUP155	2.96079	6.26882	1.08221	5.21953e-07	4.13398e-06
AP001412.1	0.112405	0.342053	1.60551	5.57471e-06	3.00744e-05
ACVR2B	0.614396	1.35999	1.14636	0.000276592	0.000855822
AP001542.3	5.24771	1.71135	-1.61656	4.92175e-06	2.70415e-05
FANK1	0.666113	1.36413	1.03414	0.000100494	0.000357115
MIR4435-2HG	1.144	2.89158	1.33777	5.67639e-06	3.05e-05
MFAP5	17.1103	3.51231	-2.28437	7.68909e-07	5.65853e-06
MIR1291	0.102882	0.316805	1.62261	0.00291079	0.00649099
ENGASE	5.16781	10.7623	1.05837	0.000242514	0.000764756
KDM6B	19.8578	9.0929	-1.1269	0.000249728	0.000783553
MAGEA4-AS1	0.039576	0.819694	4.37239	0.000608199	0.00169413
CDKN1A	211.681	83.038	-1.35005	0.00025527	0.000798006
ETV7	2.9596	7.4704	1.33578	0.00017117	0.000565732
ADCK5	3.36969	7.75558	1.20262	5.33088e-08	6.49081e-07
CHEK2	2.37682	4.85351	1.03	1.83894e-07	1.75326e-06
SOWAHD	0.321765	0.724814	1.1716	4.82888e-05	0.00018943
LINC01764	0.110212	1.64978	3.90392	0.00220723	0.00511182
LINC01842	0.184272	0.503961	1.45148	0.00446676	0.00935794
AC091390.4	0.298474	0.603611	1.01601	0.00116907	0.00296744
GRB7	8.40161	28.8538	1.78002	8.04281e-06	4.08963e-05
AMH	0.193132	1.65467	3.09889	3.55918e-06	2.04411e-05
UBE2Q1-AS1	0.0839899	0.443863	2.40183	1.19253e-07	1.23099e-06
MAD2L2	5.87894	13.5011	1.19945	1.54768e-07	1.52276e-06
CDCA5	2.67447	11.4029	2.09207	8.11119e-09	1.56413e-07
KIF26B	0.246915	1.77902	2.849	2.398e-08	3.4933e-07
COA6	10.0568	21.5756	1.10122	2.06019e-09	5.87466e-08
HDAC10	1.49705	3.05629	1.02966	1.24611e-05	5.93721e-05
CLN6	6.54534	14.6495	1.16231	2.94081e-09	7.4869e-08
AC007919.1	0.0036476	0.244015	6.06388	0.00013981	0.000474883
BREA2	0.242398	0.547519	1.17553	0.000122709	0.000423778
PBK	1.99763	7.27268	1.8642	2.01391e-07	1.88464e-06
ARTN	0.846212	2.37614	1.48953	0.00101057	0.00263133
ADA	3.13436	6.71226	1.09863	0.0102954	0.0192903
ITGB4	43.8602	91.689	1.06384	0.000756647	0.0020504
GSTM5	3.66773	0.887761	-2.04664	3.96319e-10	2.07136e-08
CNTD1	0.23798	0.531469	1.15915	3.13397e-06	1.84103e-05
TMEM74B	0.449079	3.36185	2.90421	5.93329e-09	1.24945e-07
AGMAT	0.922117	2.454	1.41211	7.46509e-06	3.84695e-05
ENTPD6	8.31007	18.0793	1.12141	1.48097e-09	4.73721e-08
SOWAHC	31.1274	12.2412	-1.34644	0.000782785	0.00211451
ARC	2.47265	0.611015	-2.01678	3.45255e-08	4.60771e-07
LINC01711	0.0568557	0.63728	3.48655	0.000264487	0.000823937
BCL2L12	4.94531	13.8545	1.48622	8.29233e-10	3.28247e-08
EPHA7	4.75057	0.633857	-2.90587	4.18374e-09	9.716e-08
KANK2	55.3858	9.68089	-2.51631	2.53069e-08	3.63301e-07
AC016065.1	0.935533	2.01586	1.10754	1.15942e-06	7.9686e-06
NGF	2.17308	0.987511	-1.13787	6.09744e-07	4.67444e-06
ECM2	2.52388	1.0527	-1.26155	1.6097e-05	7.40993e-05
SYNPO2	129.095	4.88645	-4.7235	5.47826e-11	6.58902e-09
CAMK2N2	0.200247	1.33798	2.74021	1.17046e-06	8.03267e-06
CNTN4	0.826515	0.208056	-1.99007	1.42186e-09	4.63167e-08
SYNGR2	34.9759	71.3591	1.02874	9.22703e-07	6.58778e-06
AC004241.3	0.6665	1.36905	1.03849	1.56258e-05	7.2249e-05
SMUG1	3.67031	8.56856	1.22315	1.39253e-10	1.15102e-08
AKAP6	1.97022	0.186517	-3.40097	1.04891e-07	1.11759e-06
AL355987.4	0.176009	0.767593	2.12469	0.00139493	0.00345793
PAMR1	14.9268	2.30191	-2.697	1.26179e-10	1.07127e-08
ITM2A	24.0212	6.43742	-1.89975	5.20953e-11	6.34716e-09
AL513320.1	0.28739	0.834804	1.53843	1.17046e-06	8.03267e-06
AC091812.2	0.0248521	0.211749	3.09092	0.000581879	0.0016305
WDR97	0.0922019	0.271151	1.55623	7.79993e-06	3.98774e-05
ODF3L1	2.60627	0.364427	-2.83828	1.63342e-10	1.27716e-08
LRFN4	4.5906	9.82415	1.09765	0.00347826	0.0075623
MELTF	0.701755	4.54492	2.69522	0.00111631	0.0028567
DDTL	0.872518	1.82607	1.06549	7.18679e-05	0.000266969
AC080013.3	0.309738	0.79261	1.35556	0.00207377	0.00484321
AL355877.1	0.0870804	0.219698	1.3351	0.00112275	0.00287199
RANBP1	9.96884	23.6839	1.24841	1.02492e-09	3.71245e-08
MMP14	58.4714	132.303	1.17804	2.70625e-05	0.000115613
STXBP6	2.06545	0.600722	-1.78169	2.16102e-07	1.98859e-06
PSPHP1	2.47177	15.6561	2.66311	0.00107245	0.00276394
MEIS2	5.01955	1.71632	-1.54824	1.50966e-06	1.00056e-05
HMGB1P24	0.0748017	0.208182	1.4767	0.00446298	0.00935731
AC131532.1	0.430293	1.83782	2.0946	0.000339268	0.00102276
COX17P1	0.303733	0.720409	1.24601	5.12617e-05	0.000199466
MYOM2	1.03958	0.182523	-2.50985	1.83529e-11	4.2513e-09
FAM102B	7.06317	2.99871	-1.23597	6.25815e-06	3.30579e-05
DYSF	8.89382	3.25681	-1.44934	0.00274365	0.0061696
ARHGAP27P1-BPTFP1-KPNA2P3	1.07719	2.48335	1.20502	0.000496659	0.00142142
SUCNR1	0.107504	0.477572	2.15133	0.0124805	0.0227821
SNORD69	1.28103	2.76727	1.11116	0.0179152	0.031087
ACTC1	220.29	7.18043	-4.93919	7.13752e-08	8.15103e-07
CABP4	0.333632	1.40656	2.07585	0.000249728	0.000783553
AL355512.1	0.0915131	0.36303	1.98804	0.0139903	0.0251268
CENPK	0.567035	2.53273	2.15918	1.34139e-09	4.47839e-08
TREM2	1.88812	8.00656	2.08423	8.87718e-05	0.000320868
HIST1H2AI	0.129612	3.19011	4.62133	2.22779e-08	3.29914e-07
PRX	2.09059	0.982613	-1.08922	1.48593e-07	1.47594e-06
CBX3	23.2061	49.7195	1.09931	7.39962e-11	7.67067e-09
MBOAT7	20.1027	46.8643	1.2211	5.588e-07	4.37777e-06
AC010618.2	0.228156	0.64481	1.49885	2.56247e-06	1.55353e-05
AP001992.1	0.435575	1.44178	1.72686	5.48912e-05	0.00021144
PPP1R16A	2.61848	6.57235	1.32768	5.85965e-08	6.95412e-07
SNORA26	1.39888	4.65317	1.73394	6.54096e-06	3.4368e-05
DMPK	31.1376	9.02434	-1.78677	6.13616e-05	0.000232357
AC007406.3	0.0796699	0.427096	2.42245	5.6686e-07	4.42797e-06
CNTN1	13.1486	1.97064	-2.73818	1.65831e-08	2.63553e-07
DNA2	0.597264	2.15269	1.8497	2.75959e-10	1.68659e-08
CTC-338M12.4	0.271421	0.584184	1.10589	9.46074e-08	1.0249e-06
KLHL13	2.55664	0.674845	-1.92162	1.09374e-08	1.93422e-07
AP001052.1	1.14594	2.93829	1.35845	0.00032548	0.000986269
AL662797.1	0.241845	0.574834	1.24906	2.23186e-06	1.38527e-05
PASK	0.871568	1.84444	1.0815	2.29455e-06	1.4162e-05
TLCD1	6.05408	17.7555	1.55229	2.01582e-06	1.27221e-05
PFKFB1	0.127048	0.262348	1.04611	3.40738e-05	0.000140296
ZDHHC24	2.21971	4.79663	1.11165	1.48961e-09	4.73721e-08
AL359513.1	0.731028	1.60869	1.13789	0.00020393	0.000659828
AC099329.2	0.0515749	0.958149	4.21551	0.00327322	0.00718477
PGAM1P8	0.318062	0.67186	1.07885	0.000889946	0.00235782
TMTC1	3.1032	1.02155	-1.60299	1.76598e-07	1.69316e-06
E2F2	0.710091	2.51398	1.8239	8.0689e-07	5.87493e-06
AC020928.1	0.046239	0.235819	2.3505	0.0174626	0.0303943
AC060780.3	0.575385	1.25933	1.13005	0.020775	0.0353561
CHAD	0.383087	0.988035	1.36689	0.0195851	0.0335888
GPBAR1	2.16668	0.521031	-2.05604	4.41961e-07	3.61487e-06
FCRLB	0.942604	8.23877	3.1277	1.09513e-05	5.32193e-05
AC090796.1	0.0885236	0.247897	1.48561	0.0129613	0.0235516
MIR6895	0.0986541	0.337367	1.77387	0.00470878	0.00979934
AL031985.3	0.532565	1.61533	1.6008	1.4082e-08	2.34239e-07
AL928654.4	0.454289	1.88468	2.05263	2.93183e-10	1.72445e-08
AF127577.3	0.143951	1.26462	3.13505	0.00322976	0.00710101
TRMU	2.13819	4.49886	1.07317	4.58017e-09	1.04041e-07
SLFN13	0.776914	2.75957	1.82862	0.00703652	0.0138741
AC091825.1	0.613403	0.282186	-1.12019	2.05354e-06	1.28994e-05
KLF6	92.4865	35.2167	-1.39298	3.1282e-07	2.7249e-06
LINC00106	1.07051	2.55995	1.25782	0.000315119	0.000957813
CITED4	9.54645	23.8606	1.32159	0.00198424	0.00467189
PPP1R14D	0.145987	5.17948	5.1489	2.0106e-05	8.96292e-05
CAVIN4	0.125489	0.351726	1.48689	1.52323e-05	7.07611e-05
RASL11A	16.1381	4.37923	-1.88172	1.52465e-09	4.78379e-08
AP001453.2	1.68464	6.2635	1.89453	2.2724e-07	2.0748e-06
CSF3	35.1936	3.42146	-3.36263	3.79998e-06	2.1678e-05
AC006042.3	0.0893668	0.235083	1.39536	0.0257106	0.0425255
SNORC	0.221275	0.56198	1.34468	0.000133437	0.000455712
MAL2-AS1	0.0831114	0.269355	1.69639	0.0247661	0.0411118
LRP8	0.458678	1.82964	1.996	6.30572e-08	7.3808e-07
TMCO6	2.21461	4.49484	1.02122	1.59561e-07	1.55686e-06
ARHGAP24	2.55672	0.804687	-1.66779	6.71896e-07	5.07111e-06
IER3	297.818	60.769	-2.29302	1.55595e-05	7.19782e-05
GNAO1	3.72796	0.444285	-3.06883	7.75814e-09	1.51159e-07
PTGER4P2	0.135582	0.303942	1.16463	0.00890398	0.0170353
CRTAP	45.0074	22.0471	-1.02957	5.16884e-07	4.10423e-06
ALDH1B1	81.9402	16.8957	-2.27791	0.000112797	0.000394046
PSD	19.2065	1.67633	-3.51821	1.16595e-09	4.04376e-08
SACS	2.1991	1.08099	-1.02456	0.00371564	0.00800603
OGN	23.3234	1.19661	-4.28475	2.5815e-11	4.81671e-09
CDH19	1.36328	0.217856	-2.64564	4.94286e-10	2.42148e-08
LINC00853	0.284242	0.928792	1.70824	5.82944e-06	3.11987e-05
CCDC14	1.70991	4.70088	1.45901	5.16513e-08	6.31357e-07
CRY2	11.5349	4.15743	-1.47224	4.1407e-12	2.64326e-09
LINC02257	0.0238928	0.447058	4.22581	2.59912e-05	0.000111851
AC034231.1	0.483843	1.24444	1.36289	3.0627e-05	0.000128244
RNF186	0.0696301	1.12904	4.01924	0.021987	0.0371593
PRR11	1.60283	7.2898	2.18526	2.87434e-09	7.38785e-08
AC010719.1	0.333171	1.0864	1.70522	7.15657e-05	0.000265951
GHRLOS	0.249253	0.797226	1.67738	1.35758e-05	6.39365e-05
MIR100HG	7.42149	1.15038	-2.6896	3.7995e-11	5.36014e-09
ZEB2	3.32197	1.03114	-1.6878	1.69542e-08	2.6777e-07
COL21A1	2.37578	0.5879	-2.01476	3.56959e-09	8.60877e-08
AC002059.1	0.521747	1.80429	1.79001	0.00337446	0.00736852
FAM81A	0.28662	0.581637	1.02098	0.0247589	0.0411034
SPIN4	1.55877	3.38748	1.11981	0.00315757	0.00696514
AL033384.2	0.481815	0.980849	1.02555	0.00507894	0.0104643
CDC42EP3	12.5634	4.68723	-1.42242	0.00015292	0.000512913
SLC8A2	1.02636	0.296326	-1.79228	0.0020607	0.00482062
PKMYT1	1.41739	5.40897	1.93211	2.56334e-09	6.79322e-08
PFN4	0.368672	0.863549	1.22794	9.87092e-06	4.87518e-05
DMRTA2	0.0783588	1.067	3.76732	3.34187e-05	0.000138083
AL645608.7	1.18326	2.78192	1.23332	0.018299	0.0316447
Z84484.1	0.182392	0.53968	1.56506	0.000152638	0.000512426
TTK	0.873758	4.87545	2.48023	3.51395e-10	1.94491e-08
AC011477.3	0.95625	2.20015	1.20214	0.000788112	0.00212798
AC008105.1	0.154861	0.715434	2.20784	2.74318e-08	3.85257e-07
RHEBL1	0.500561	1.97886	1.98305	1.95268e-08	2.97871e-07
RNU6-353P	0.162653	0.491787	1.59624	0.0122317	0.022395
HBB	39.5619	15.6356	-1.33928	3.27068e-05	0.000135619
FILIP1L	30.6159	6.1423	-2.31743	5.74221e-10	2.65372e-08
SAC3D1	3.48271	10.9206	1.64877	6.1671e-10	2.75508e-08
OGFRP1	0.168278	0.408392	1.27911	1.70805e-05	7.79951e-05
AC010542.5	1.08515	2.78102	1.35772	3.03631e-07	2.65224e-06
AC068790.5	0.11069	0.443278	2.00168	2.65338e-05	0.000113795
PECAM1	27.039	13.0204	-1.05426	1.98792e-05	8.87023e-05
SLC25A10	5.32491	12.3226	1.21048	7.53379e-05	0.00027848
NETO2	1.31901	3.41786	1.37364	0.000637687	0.00176708
DUSP5P1	0.0405633	0.481294	3.56867	1.67229e-06	1.08983e-05
PLK3	17.4456	8.13805	-1.10011	0.0078696	0.0153172
ALG3	8.98719	22.7317	1.33876	5.08004e-11	6.31236e-09
SPDL1	1.5145	3.22652	1.09113	2.24969e-07	2.05907e-06
UBE2T	5.80331	23.0067	1.98711	4.80109e-10	2.38314e-08
AL118511.1	0.0999583	0.290893	1.54109	9.80561e-05	0.000349711
SNORA71A	1.15107	4.38811	1.93062	0.0284677	0.0464356
AC012085.2	2.97857	0.185074	-4.00844	3.78754e-11	5.36014e-09
MSRB3	40.9359	4.40718	-3.21544	5.27507e-08	6.43119e-07
PDIA3	72.0602	145.874	1.01745	2.5052e-09	6.70543e-08
AL158835.2	0.181282	0.373614	1.04331	0.0167814	0.029373
AC108463.2	0.111676	0.29235	1.38838	0.000677611	0.0018638
WDR66	0.0824711	0.746999	3.17915	5.32234e-07	4.19946e-06
PYGB	110.041	40.132	-1.45521	0.00389743	0.00834979
AL161431.1	0.0659409	5.47398	6.37527	2.21878e-05	9.74964e-05
C10orf95	0.297552	0.732998	1.30067	7.69794e-06	3.94851e-05
SNHG25	1.20201	4.65337	1.95283	8.86477e-09	1.66663e-07
IMPDH1P5	0.11526	0.251692	1.12677	0.019146	0.0329488
AC122718.1	0.677556	0.233651	-1.53598	4.92343e-07	3.94274e-06
RPL21P13	0.0532478	1.5252	4.84014	0.0103817	0.0194267
HOXB3	2.30624	4.75643	1.04434	0.00331439	0.00725561
GTPBP3	2.56919	5.97584	1.21783	3.11455e-10	1.79259e-08
CDKN2B-AS1	0.0497522	0.344269	2.7907	0.00203421	0.00477215
SLC24A3	10.0749	2.36268	-2.09226	2.19073e-10	1.49471e-08
UBXN11	2.94416	6.49991	1.14256	2.61457e-07	2.32719e-06
ITGA8	10.5044	1.13345	-3.21221	2.59801e-12	2.11941e-09
CASP6	6.25651	14.2051	1.18298	5.12689e-09	1.13172e-07
LINC02550	1.01401	0.491739	-1.04411	1.69189e-05	7.73944e-05
KLC3	0.599445	3.08616	2.36411	2.99131e-07	2.61782e-06
HAGHL	0.462226	1.0551	1.19071	2.61457e-07	2.32719e-06
RPSAP70	1.12757	0.505797	-1.15659	3.44824e-07	2.9543e-06
MSLN	0.744651	8.94733	3.58682	0.00967292	0.0182754
AC131235.3	0.465406	0.952907	1.03385	0.000175713	0.000578504
SMIM10	9.60799	3.23794	-1.56916	8.14676e-07	5.92242e-06
HBEGF	74.4291	11.5684	-2.68568	1.47853e-05	6.88377e-05
BARX1	0.0580185	3.05791	5.71989	1.25319e-06	8.52563e-06
CAP2	9.69859	2.574	-1.91376	5.33352e-06	2.89647e-05
AC092171.4	0.200543	0.949727	2.2436	9.21536e-09	1.72047e-07
LRRC4B	2.28398	0.724465	-1.65656	1.99009e-09	5.7358e-08
GINS2	2.32056	7.41306	1.6756	6.5625e-09	1.34424e-07
PHACTR1	0.955914	0.454448	-1.07277	8.14676e-07	5.92242e-06
AC104564.4	0.0414038	0.265657	2.68173	0.000303792	0.000927595
HSD17B6	12.3573	2.34489	-2.39777	1.6409e-08	2.61138e-07
CIAO2A	7.59715	15.2358	1.00394	7.58726e-09	1.48756e-07
ZNF695	0.0895632	0.574892	2.68231	3.82283e-10	2.04354e-08
HIST1H2AE	0.748426	10.0101	3.74145	2.90739e-09	7.44221e-08
TNNT2	4.65847	0.727752	-2.67834	0.000140717	0.000477535
ARID5B	24.4674	7.87563	-1.63539	1.5635e-07	1.53672e-06
ESCO2	0.287197	0.961184	1.74277	1.21124e-07	1.24188e-06
C6orf52	0.432768	1.34931	1.64056	1.42896e-05	6.68786e-05
AL136221.1	0.0810925	0.369841	2.18927	0.000127336	0.000438064
AL121845.3	0.195919	0.511291	1.38389	7.6091e-08	8.57475e-07
SBSPON	17.7369	2.28897	-2.95398	1.3695e-07	1.37928e-06
TMEM151A	0.0291902	0.232117	2.99129	0.00047244	0.00135957
AC016027.1	0.194616	0.529398	1.44372	6.4391e-08	7.49949e-07
CPQ	18.5894	7.25238	-1.35796	1.73056e-07	1.66515e-06
ATAD3A	7.38616	15.8313	1.09988	3.6104e-09	8.67374e-08
WASH6P	2.81909	10.6284	1.91463	0.00067835	0.0018638
AL132780.5	0.050541	0.22645	2.16366	1.97377e-08	3.00629e-07
CCDC151	0.151844	0.427318	1.49272	0.0116483	0.0214798
HCAR2	3.65957	9.17314	1.32574	0.00576722	0.0116719
CACNA2D1	4.34871	1.06909	-2.0242	2.61009e-06	1.57927e-05
AC119150.1	0.156757	0.487765	1.63766	0.0253313	0.0419756
LINC01355	0.545476	1.622	1.57219	3.43236e-06	1.98385e-05
CEP85L	1.78507	0.627856	-1.50748	1.79346e-09	5.33292e-08
NCKAP1L	5.38988	2.17929	-1.3064	3.40738e-05	0.000140296
AL109917.1	0.195582	0.568781	1.5401	3.91387e-05	0.000158439
TOB2P1	0.180396	0.511396	1.50327	0.000108536	0.000381969
CEP131	3.76469	10.1167	1.42613	2.53411e-09	6.76351e-08
DCLK1	1.51443	0.352605	-2.10265	1.16846e-08	2.03004e-07
RNU6-1157P	0.113798	0.390365	1.77835	0.00434649	0.00915095
SNORD14A	3.75119	7.97043	1.08731	1.57591e-05	7.27398e-05
HIST1H3C	0.103735	1.85553	4.16086	1.38204e-07	1.39116e-06
HIST1H4C	0.0755929	2.86877	5.24604	3.36027e-06	1.95379e-05
AC090229.1	0.181704	0.770814	2.08479	3.35206e-05	0.000138443
MZT2A	6.02409	12.9483	1.10395	4.09333e-08	5.2641e-07
NPM3	19.4801	39.4324	1.01738	1.13765e-06	7.82757e-06
AC108860.2	0.462079	1.66804	1.85194	2.24132e-06	1.39067e-05
SLC9A3-AS1	1.98528	4.14849	1.06325	0.00522857	0.0107311
CRYBB3	0.171568	0.485925	1.50195	0.00461216	0.0096346
SCN11A	4.28142	0.216946	-4.30268	1.92391e-06	1.22315e-05
AC084864.1	0.0518561	0.388418	2.90502	2.21023e-06	1.37661e-05
HIST2H2AB	0.0437357	1.60686	5.19929	4.34509e-06	2.43582e-05
CAVIN1	221.933	67.5416	-1.71628	2.83449e-06	1.69753e-05
JUN	257.588	68.3544	-1.91396	1.60551e-08	2.57912e-07
ATXN7L2	0.821164	1.94133	1.24131	3.32011e-07	2.86021e-06
CCNA2	3.35787	13.9133	2.05084	5.80165e-09	1.2342e-07
AC011447.7	0.474636	2.52836	2.41331	2.49289e-06	1.51963e-05
ATP5MF	28.7551	59.6926	1.05373	1.57085e-08	2.54305e-07
RN7SL535P	0.030258	0.327502	3.43612	1.14315e-05	5.51083e-05
PLA2G7	1.76141	4.40446	1.32223	0.00107998	0.0027785
DNAJC18	2.23141	0.97722	-1.1912	4.92245e-07	3.94274e-06
PDF	0.949064	2.06948	1.12469	2.09675e-07	1.94566e-06
MAP1A	10.144	1.46964	-2.7871	8.54699e-07	6.17509e-06
AC007731.2	0.0989882	0.365417	1.88422	1.01728e-05	5.00716e-05
RTKN	2.96097	9.04064	1.61036	2.74844e-07	2.43135e-06
AC243830.2	0.156997	0.425734	1.43922	0.0123349	0.0225641
PALM3	2.61393	12.0816	2.20852	0.00279467	0.00627006
NDUFAF4P3	0.437867	0.190033	-1.20425	0.000697685	0.00191161
CCHCR1	4.11309	8.46971	1.04209	3.62428e-06	2.07514e-05
EIF5AP3	0.0832878	0.236844	1.50776	0.00891277	0.0170504
AC010319.1	0.12395	0.322582	1.3799	0.00639074	0.0127876
C1QTNF2	2.28313	0.585438	-1.96343	2.19073e-10	1.49471e-08
REEP2	3.87416	1.3742	-1.49529	1.52388e-06	1.00785e-05
TMEM220-AS1	0.567774	0.197262	-1.5252	2.39157e-09	6.52545e-08
PRELP	42.8381	3.96298	-3.43424	1.98707e-10	1.42849e-08
PTPRD	1.22623	0.384605	-1.67278	2.01714e-08	3.05975e-07
CD55	91.0676	26.1679	-1.79914	0.00118457	0.00300433
GLI2	1.02895	0.461605	-1.15644	3.89623e-06	2.21463e-05
AC018641.1	0.131613	0.519256	1.98015	0.00044401	0.00128862
MIR210	0.436299	1.31778	1.59473	0.00485698	0.0100809
MDFI	9.05222	25.8317	1.5128	0.000230359	0.000731959
HOXB7	8.33649	20.0264	1.26439	4.11292e-06	2.32442e-05
SAMD15	0.155948	0.515954	1.72618	2.97294e-08	4.11366e-07
STON1	6.33359	1.32047	-2.26197	1.60551e-08	2.57912e-07
HMMR	1.16719	5.63412	2.27115	1.71227e-09	5.15688e-08
DCHS1	6.68597	1.78584	-1.90454	1.41209e-07	1.41609e-06
RNU6-611P	0.314796	0.701962	1.15697	0.00812301	0.0157515
SELENOP	13.763	6.80802	-1.01549	1.89557e-07	1.79176e-06
NR2F1	11.6356	3.71999	-1.64517	5.7369e-09	1.22878e-07
HSPA2	13.5403	4.13971	-1.70966	4.50281e-08	5.67403e-07
CPA6	1.44289	0.32952	-2.13053	0.000401363	0.0011826
AC118344.2	0.13154	0.30616	1.21878	0.00156716	0.00381977
CNPY2	5.84331	12.6212	1.11099	2.6705e-08	3.76175e-07
RNU6-1010P	0.67576	0.28016	-1.27026	4.78197e-06	2.64283e-05
FAM184A	0.680315	0.336379	-1.01612	0.000105255	0.000371991
RPS7P3	0.190377	0.389626	1.03323	0.000772154	0.00208901
AL132656.4	0.407877	0.190608	-1.09752	8.73858e-05	0.000316583
DIP2C	6.70223	3.18597	-1.07291	0.00261173	0.00591762
RCAN2	24.4643	3.14372	-2.96014	1.21383e-11	3.59596e-09
KIF15	0.712312	3.33404	2.22669	1.67303e-09	5.10424e-08
AC073957.3	0.328445	0.851162	1.37378	0.000566996	0.00159403
APOBEC3H	0.680041	1.44068	1.08306	0.0149122	0.0265588
CDK1	2.77574	15.8116	2.51004	5.34224e-11	6.46687e-09
FAHD2P1	0.0764352	1.79066	4.55011	0.000394055	0.00116326
CPED1	9.98133	0.838039	-3.57414	1.22179e-09	4.16808e-08
AC010168.2	0.328212	0.997278	1.60337	4.49134e-05	0.000177975
KRT18	113.894	349.599	1.61801	1.65117e-05	7.57851e-05
LDLRAD4	1.60875	0.740207	-1.11994	1.90659e-06	1.21472e-05
AC003101.2	0.0950037	0.302497	1.67087	0.00402982	0.00859613
MFSD13A	1.12706	3.11974	1.46886	2.84166e-09	7.32391e-08
KLHDC1	1.29465	0.544891	-1.24853	9.65828e-08	1.04029e-06
HIST1H2BE	0.0826613	1.82262	4.46266	2.65141e-09	6.94265e-08
HOXC13	0.287473	2.03044	2.82029	1.84591e-05	8.32367e-05
UPK3B	37.4429	77.3712	1.0471	0.0281978	0.0460747
GHET1	0.177897	0.407231	1.19481	2.70625e-05	0.000115613
SMKR1	0.304993	1.51513	2.31259	1.55582e-05	7.19782e-05
AL133153.2	0.0808423	0.222813	1.46265	0.00218265	0.00506155
CD164L2	0.232009	0.634337	1.45107	5.50488e-05	0.000212003
HIST1H4J	0.111852	0.502384	2.16721	0.000153085	0.000513375
PTGER3	1.62397	0.451064	-1.84812	3.40134e-06	1.96852e-05
JPH4	0.765871	0.353846	-1.11398	7.0814e-06	3.68363e-05
LMO7-AS1	0.316555	1.18386	1.90297	1.34602e-05	6.34557e-05
AL049555.1	5.57912	11.3299	1.02202	0.000243404	0.000767432
ALPG	0.00841819	0.674844	6.3249	0.000114794	0.000400052
KCNK13	0.169881	1.13464	2.73964	0.000637685	0.00176708
KLRB1	5.17819	1.2946	-1.99994	0.00104474	0.00270491
COMTD1	6.7211	15.604	1.21515	1.03977e-05	5.09247e-05
CDCA2	0.593933	2.92365	2.2994	1.71227e-09	5.15688e-08
SOX9	3.68918	11.673	1.66181	0.00459908	0.00960835
AL451050.2	0.208788	0.836608	2.00252	3.30366e-07	2.85127e-06
BDNF	0.85604	0.249823	-1.77677	6.86255e-09	1.38603e-07
EPHA3	5.43045	1.02708	-2.40252	1.96725e-09	5.69621e-08
HOXC6	0.123373	1.17819	3.25548	3.86082e-06	2.19672e-05
MSH2	4.75193	10.4906	1.14251	1.3418e-07	1.35502e-06
AR	3.06519	1.45733	-1.07265	5.1466e-06	2.81123e-05
RN7SL689P	3.57022	1.22816	-1.53952	1.093e-07	1.15344e-06
SLC16A13	1.635	4.29788	1.39434	7.61663e-07	5.62198e-06
AC073046.1	0.952664	2.38425	1.3235	0.00330434	0.00724207
LINC01186	0.071072	0.33532	2.23819	0.000244909	0.00077114
AC026740.1	0.70418	1.80967	1.36171	3.32472e-05	0.000137405
PHEX	0.123848	0.3771	1.60638	0.02675	0.044004
PI4KAP1	0.53953	2.77121	2.36074	5.7124e-05	0.000218649
EFEMP1	37.2686	15.8095	-1.23717	4.22555e-06	2.37733e-05
GOLGA8A	2.73742	7.28017	1.41116	0.00052522	0.00149178
OXER1	3.4926	1.1196	-1.64132	2.08408e-09	5.92479e-08
LEMD1	0.0362172	0.596617	4.04206	0.000335642	0.00101346
DLL3	0.0492815	0.583899	3.5666	0.000107091	0.000377839
AL583785.1	1.59459	0.628873	-1.34235	2.58487e-07	2.31172e-06
ACRBP	0.433618	1.0763	1.31158	0.000655471	0.00180835
LINC02163	0.158834	0.929826	2.54944	3.7339e-05	0.000152137
RFX8	0.0813599	0.284701	1.80706	0.00603707	0.0121523
ADCY4	1.88558	0.938755	-1.00619	7.93785e-06	4.04613e-05
GTSE1	0.826956	4.98362	2.59131	5.83331e-11	6.84065e-09
NUSAP1	4.64143	20.1493	2.11809	3.69338e-09	8.79428e-08
AC009097.2	0.0726928	0.340078	2.22598	2.04179e-06	1.28643e-05
GALNT17	5.47157	0.600317	-3.18816	4.05885e-10	2.08684e-08
AC138904.1	0.0360704	0.480032	3.73424	5.67993e-07	4.43498e-06
AC097372.3	0.214784	0.437923	1.02779	0.00243876	0.00558061
MCM2	4.98851	20.2811	2.02346	1.38913e-09	4.5807e-08
RASSF8	4.60338	2.10568	-1.12841	0.000175058	0.00057655
RGS5	34.0531	7.52012	-2.17896	8.57453e-09	1.62673e-07
AC007128.2	0.0550717	0.378771	2.78194	9.10058e-06	4.53892e-05
SMTN	72.4963	9.28225	-2.96536	4.73793e-09	1.0621e-07
LINGO1	0.431253	1.1447	1.40836	0.00022867	0.000727578
CH25H	15.9923	2.09413	-2.93296	1.02367e-08	1.83977e-07
CDKN3	2.33785	8.19073	1.80881	6.92778e-08	7.95508e-07
SNORD99	3.60802	11.2091	1.63539	2.11785e-08	3.17897e-07
ITGA3	22.3165	52.0909	1.22292	0.00413601	0.00878369
FAM83A	8.60529	21.0408	1.2899	0.00224997	0.00519841
BCL2	3.3494	1.29753	-1.36814	5.60704e-10	2.61703e-08
AC003102.1	1.3325	2.67015	1.00278	0.0018273	0.00435594
AC099487.1	0.0572981	0.32514	2.5045	0.00231706	0.00533895
AVPR2	1.01274	0.342929	-1.56228	5.05722e-08	6.20617e-07
POLE	1.78395	4.02679	1.17456	2.94081e-09	7.4869e-08
BRIP1	0.351721	1.67215	2.2492	9.11235e-10	3.4195e-08
AC009955.2	0.023905	0.234401	3.29359	9.72811e-05	0.000347607
HIST1H2BI	0.0279468	1.9751	6.1431	5.93923e-07	4.58591e-06
IL11RA	4.25583	2.06376	-1.04417	4.12583e-07	3.42081e-06
AC093582.1	0.241306	0.490947	1.02471	0.00775928	0.0151338
CAMK2N1	26.8715	63.7223	1.24572	0.00550779	0.0112305
DIO3OS	1.45301	0.50821	-1.51555	1.91026e-08	2.92667e-07
ERC1	7.56564	3.75822	-1.00941	0.000146146	0.000493583
LSR	49.9109	111.566	1.16048	6.42646e-06	3.38042e-05
Z93930.3	0.194436	0.392753	1.01433	0.00110529	0.00283353
LINC00960	0.455781	1.19252	1.3876	0.00791348	0.0153882
NCBP2-AS1	0.110094	0.372487	1.75845	6.40123e-05	0.00024142
PSPH	2.86204	6.85697	1.26053	3.1282e-07	2.7249e-06
TSHZ2	1.62201	0.745796	-1.12093	2.56281e-07	2.29308e-06
GPRIN2	0.881414	2.37357	1.42917	0.014758	0.0263198
ATP13A2	6.95375	15.1388	1.12238	9.36987e-09	1.73038e-07
CCDC78	0.262867	0.648158	1.30201	4.41986e-06	2.46522e-05
AC010595.1	0.0185491	0.23672	3.67376	4.4216e-05	0.000175917
KRT18P11	0.109362	0.335436	1.61692	0.00017233	0.000569364
RNU7-75P	0.142641	0.792303	2.47367	0.00490954	0.0101765
SAA4	0.026294	0.249314	3.24516	0.0196963	0.0337592
AC104785.1	0.156518	0.619766	1.9854	2.40267e-06	1.47525e-05
CENPN	2.29826	4.84938	1.07726	7.14403e-06	3.71003e-05
GTF2IP20	1.27676	3.23308	1.34042	2.01582e-06	1.27221e-05
FAM171A2	0.300669	1.88441	2.64786	2.56281e-07	2.29308e-06
FCER2	1.964	0.762143	-1.36566	1.71257e-06	1.1111e-05
FEN1	8.26331	26.298	1.67016	8.57453e-09	1.62673e-07
AC097641.2	0.236738	0.781662	1.72325	1.39062e-07	1.3983e-06
TMEM190	0.120718	0.320724	1.40969	8.71646e-05	0.000316033
ENO1-AS1	0.18236	0.428766	1.2334	0.000711055	0.00194398
SLC28A3	0.256637	1.61824	2.65662	0.00128995	0.00323153
KLK6	6.49709	13.8709	1.0942	0.00737275	0.0144778
AC007014.2	0.129299	0.48518	1.90781	9.86196e-07	6.94256e-06
AL139099.3	0.76157	1.6291	1.09703	4.07592e-05	0.000163798
COX7A1	31.7541	5.72857	-2.4707	1.98707e-10	1.42849e-08
AC068620.2	0.276704	0.592547	1.09859	0.00168184	0.00406654
GRP	0.354986	1.02198	1.52554	0.00473089	0.00984207
AC138305.3	0.158749	0.493891	1.63745	0.000115251	0.000401495
VN1R42P	0.158142	0.446814	1.49845	0.00178468	0.00427063
KRT33B	0.0797929	0.86849	3.44418	0.00558447	0.0113683
MT1A	16.4611	3.48811	-2.23854	5.59335e-07	4.38013e-06
ZWILCH	2.07524	5.16792	1.31631	8.69292e-10	3.33549e-08
TTYH3	7.80611	24.8485	1.67048	2.03618e-10	1.44169e-08
AL691432.1	0.227929	0.694754	1.60792	0.000706772	0.00193286
CAPN12	0.307649	0.837315	1.44449	0.000164252	0.00054614
RPA3	4.3961	9.67625	1.13823	3.41614e-08	4.57183e-07
VCX	0.0721941	0.884503	3.61491	0.00466298	0.00972127
AC073343.1	1.27615	0.557976	-1.19353	2.38795e-07	2.1574e-06
AC082651.3	0.241364	0.546735	1.17963	0.0219502	0.0371004
PER1	26.8116	7.09341	-1.91831	2.81498e-12	2.20072e-09
AL358334.2	0.140367	0.385223	1.45649	0.00213995	0.00497555
AL139041.1	0.140207	0.351761	1.32704	0.000643617	0.0017801
ACTL8	0.0739956	0.673113	3.18534	0.00104455	0.00270491
MCM6	7.72951	17.2635	1.15928	6.40161e-07	4.88266e-06
PLA2G2F	2.96546	17.158	2.53256	0.00203487	0.00477215
KRT8P45	0.614783	1.37911	1.16558	0.00440069	0.00924328
AC130371.2	2.53624	1.25041	-1.02029	5.64262e-07	4.40953e-06
MCM8	1.2066	2.86902	1.24961	2.36548e-07	2.14206e-06
RNA5SP283	2.19837	5.22731	1.24964	0.000298491	0.000913935
RAP1A	30.1664	12.908	-1.22468	2.40942e-05	0.000104866
AC114956.1	0.168679	0.514659	1.60934	0.000710786	0.00194353
OXTR	0.191856	0.939659	2.29211	1.82746e-05	8.25634e-05
GRASP	10.4856	2.99873	-1.80599	1.01243e-08	1.82655e-07
TXNP6	0.126344	0.361112	1.51508	0.00604898	0.0121739
KCNS3	3.12643	6.7185	1.10362	0.00850425	0.0163757
ATP1B2	2.53339	0.498197	-2.34628	4.09929e-11	5.61423e-09
AC093616.1	0.0779143	0.224409	1.52617	0.000914159	0.00241484
LIN28A	0.000671469	0.250253	8.54185	0.000794171	0.00214126
AL603832.1	0.115162	0.408381	1.82626	1.44979e-06	9.69089e-06
MMP13	1.12958	16.6347	3.88034	0.000215555	0.000691051
TMEM255A	0.906997	0.303574	-1.57905	1.57928e-07	1.54756e-06
SYNC	2.52489	0.560407	-2.17167	2.75138e-05	0.000117195
DCLRE1B	1.69021	3.47781	1.04097	6.21818e-07	4.76017e-06
ZNF419	0.561658	1.12876	1.00697	1.73056e-07	1.66515e-06
ZNF702P	0.89493	1.91271	1.09577	0.00394412	0.00843056
ZNF32-AS2	0.387687	0.842764	1.12024	0.000443829	0.0012883
RNU4-52P	0.118503	0.402516	1.76412	0.001091	0.00280301
MORF4L2-AS1	0.0916717	0.215294	1.23176	0.000591066	0.00165279
RN7SKP269	0.10915	0.291833	1.41883	0.00149427	0.00366927
ZNF749	0.726603	1.48241	1.0287	4.87455e-07	3.91361e-06
EGR1	571.889	64.9546	-3.13823	1.65563e-11	3.98263e-09
AC023043.4	0.833783	2.84171	1.76901	1.24906e-07	1.27578e-06
AC010319.4	0.185089	0.549929	1.57102	4.64763e-08	5.8217e-07
AC022413.1	0.376201	0.777701	1.04771	3.63745e-05	0.000148595
C15orf56	0.105499	0.235055	1.15577	0.000489709	0.00140388
TRIP13	1.98529	9.63648	2.27916	3.33401e-09	8.16659e-08
ERBB2	23.018	63.2601	1.45854	0.00392071	0.00839009
NLN	1.24286	2.70995	1.1246	8.79615e-07	6.32345e-06
PCDHB9	0.353479	0.798283	1.17528	0.00923465	0.0175677
ELN	26.4519	6.82864	-1.9537	4.36209e-08	5.55264e-07
PAQR6	1.01367	2.88604	1.5095	0.000308367	0.000939269
MSI1	0.264078	1.90309	2.8493	0.00331438	0.00725561
LGI4	3.95327	0.929553	-2.08844	1.51263e-11	3.88788e-09
CCDC162P	0.131989	1.02592	2.95843	0.000540063	0.00152863
FCER1A	5.53612	1.31797	-2.07056	1.96574e-09	5.69621e-08
KLHL30	0.827253	0.237536	-1.80018	4.26371e-06	2.39666e-05
AC083862.2	0.37795	0.799349	1.08063	3.37961e-05	0.000139397
TSPAN11	2.98739	0.975751	-1.6143	2.32166e-08	3.40855e-07
FKBPL	3.88737	8.90875	1.19643	7.53031e-08	8.51665e-07
[truncated: 2,878 more rows]
