# Supplementary material for: Development of prognostic signature based on immune-related genes in muscle-invasive bladder cancer: bioinformatics analysis of TCGA database
Source: Aging (Albany NY). 2021 Jan 19;13(2):1859–71. doi: 10.18632/aging.103787 (PMC7880322; doi:10.18632/aging.103787)
Supplement: Supplementary Table 2 [file aging-13-103787-s003.xlsx]

## Sheet: Supplementary Material S2
Supplementary Table 2. Different expressions of immune-related genes.
ID	conMean	treatMean	logFC	pValue	fdr
CALR	192.36	451.977	1.23244	7.49258e-11	7.68214e-09
CD1C	2.92316	1.43536	-1.02611	2.17972e-05	9.60128e-05
CD1E	0.829563	0.396694	-1.06433	0.00685762	0.0135928
PDIA3	72.0602	145.874	1.01745	2.5052e-09	6.70543e-08
HLA-G	1.62667	4.18834	1.36446	0.0121546	0.0222754
HSPA2	13.5403	4.13971	-1.70966	4.50281e-08	5.67403e-07
MICB	0.894485	3.60451	2.01067	4.07602e-06	2.30634e-05
PSMD3	19.2363	41.0308	1.09288	1.02255e-10	9.45129e-09
TAP1	18.581	48.1963	1.37509	0.00959428	0.0181396
TAP2	4.29674	9.86191	1.19862	0.000419427	0.00122677
THBS1	197.003	38.1942	-2.36679	2.72873e-05	0.000116388
ULBP3	0.605212	1.29871	1.10157	0.00166042	0.00401788
ULBP2	0.913519	5.6933	2.63976	1.50372e-08	2.46843e-07
ULBP1	0.0423714	0.415128	3.29239	4.04997e-08	5.22286e-07
PDIA2	0.0624985	0.519846	3.05619	0.000140132	0.000475889
PI3	190.788	464.115	1.28251	0.00421004	0.00890681
CXCL10	7.5084	56.0902	2.90117	0.00173648	0.00417604
CXCL9	4.40377	24.1808	2.45705	0.0261134	0.0430891
CXCL5	0.332086	4.83858	3.86496	0.00183709	0.00437649
CXCL11	1.35574	13.6558	3.33237	0.000387915	0.00114893
CXCL12	22.2139	6.44619	-1.78494	2.06019e-09	5.87466e-08
CXCL2	23.8495	5.78528	-2.0435	1.06711e-05	5.20192e-05
XCL1	0.619883	2.05601	1.72978	0.00134142	0.00334318
TMSB10	1497.02	3087.56	1.04437	9.40502e-07	6.67674e-06
PTGDS	77.6312	16.4003	-2.24291	1.67705e-08	2.6554e-07
TMSB15A	0.745467	4.55653	2.61172	0.000761802	0.00206349
S100B	5.80393	2.75943	-1.07266	4.54052e-06	2.52352e-05
S100A7	46.7744	277.208	2.56718	0.00721412	0.0141915
DEFB126	0.0656956	0.818146	3.63849	0.000115063	0.000400916
LCN12	0.111925	0.496896	2.15041	0.000213982	0.000687138
S100A11	942.812	2012.05	1.09363	1.40478e-05	6.59112e-05
S100A7A	0.167886	3.11636	4.21431	0.0010687	0.00275629
COLEC12	7.13329	1.99012	-1.84172	2.81778e-08	3.94259e-07
ZC3HAV1L	0.896609	2.26902	1.33952	4.07597e-05	0.000163798
TINAGL1	24.0209	87.4944	1.8649	1.61197e-06	1.05751e-05
IL6	48.1763	5.19076	-3.21431	3.13593e-08	4.27983e-07
MMP9	6.21224	50.9576	3.03611	0.00315757	0.00696514
A2M	321.62	74.2286	-2.11531	1.91557e-10	1.39852e-08
FABP6	3.02486	12.0328	1.99204	0.00123201	0.00310748
TLR2	1.88067	4.51206	1.26254	0.00454541	0.00950256
PLAU	15.6299	74.6038	2.25494	9.78563e-06	4.8407e-05
PAEP	0.00665712	0.873719	7.03613	2.29836e-05	0.000100523
LBP	0.0819913	1.86675	4.50891	0.0127339	0.0232013
RBP7	10.6043	4.84684	-1.12953	9.13926e-07	6.53755e-06
C8G	0.361272	0.906348	1.32698	5.38125e-06	2.91732e-05
PI15	2.04721	0.758603	-1.43224	0.000168608	0.0005582
CTSG	12.4415	1.87392	-2.73103	5.22141e-09	1.14718e-07
TFRC	12.7036	32.278	1.34532	8.47188e-05	0.000308058
IFIH1	3.11338	6.80756	1.12865	0.0223412	0.0376629
ADIPOQ	1.35568	0.573094	-1.24217	3.42248e-08	4.57704e-07
STAT1	26.6203	53.358	1.00317	0.0109827	0.0203948
SOCS3	218.854	48.5744	-2.1717	1.19449e-08	2.06374e-07
CHIT1	0.0712556	0.917104	3.68601	0.00254794	0.00578642
ISG15	37.9323	217.561	2.51992	2.84817e-08	3.97621e-07
TNFAIP3	33.0966	13.0561	-1.34196	0.000112797	0.000394046
TFR2	0.190288	1.12756	2.56694	1.87651e-07	1.78093e-06
ELN	26.4519	6.82864	-1.9537	4.36209e-08	5.55264e-07
MAPT	1.50588	0.305989	-2.29905	1.67938e-05	7.68543e-05
CST4	0.00808169	2.57371	8.31498	1.31649e-07	1.33376e-06
CSRP1	217.606	26.2747	-3.04997	1.50703e-09	4.75234e-08
JUN	257.588	68.3544	-1.91396	1.60551e-08	2.57912e-07
IRF5	3.2458	9.92048	1.61184	5.11863e-07	4.07471e-06
CACYBP	10.0152	21.05	1.07163	3.04016e-10	1.76057e-08
BST2	88.1137	193.946	1.13822	0.017131	0.0298753
PLA2G2A	124.472	59.6193	-1.06197	4.04305e-05	0.000162719
PDGFRA	10.109	2.74759	-1.8794	1.5165e-07	1.49995e-06
TPM2	433.347	61.4679	-2.81762	2.77599e-07	2.45226e-06
AHNAK	99.4444	41.9572	-1.24497	5.21953e-07	4.13398e-06
FGF2	4.06727	0.75576	-2.42806	1.71582e-10	1.29815e-08
NFKBIZ	15.2721	6.16191	-1.30945	0.000192884	0.000629187
PDF	0.949064	2.06948	1.12469	2.09675e-07	1.94566e-06
SLC11A1	0.672319	1.44893	1.10777	0.00272684	0.00613914
DES	2904.36	172.285	-4.07536	6.62261e-10	2.8965e-08
APOBEC3H	0.680041	1.44068	1.08306	0.0149122	0.0265588
TMPRSS6	0.0785883	0.275942	1.81198	0.00317679	0.00700014
KCNH2	6.12051	1.28152	-2.2558	7.01754e-09	1.40673e-07
JUND	232.251	94.7142	-1.29403	2.99426e-06	1.77452e-05
IRF7	7.37709	17.0421	1.20798	9.0163e-05	0.000325145
ILK	9.11717	2.66608	-1.77387	3.5916e-06	2.06083e-05
PTX3	13.0602	3.18861	-2.03418	1.92216e-05	8.6241e-05
PTGS2	62.5859	14.7037	-2.08966	6.71896e-07	5.07111e-06
CD40LG	0.807344	0.286448	-1.49491	6.53139e-05	0.000245884
PROC	0.307019	1.03129	1.74806	0.000823568	0.00221036
IRF9	1.07316	2.38013	1.14918	4.17625e-05	0.00016747
HMOX1	13.4398	31.3214	1.22064	0.0228974	0.0384485
RNASE7	0.348343	3.25911	3.2259	0.000231088	0.000733904
ABCC4	7.87284	3.47646	-1.17927	7.71317e-05	0.000284271
RSAD2	1.32031	6.50329	2.30029	0.00250107	0.00569718
ARG2	10.9872	3.89895	-1.49466	0.00818142	0.0158354
AQP9	0.583649	1.5875	1.44358	0.0194385	0.0333844
BIRC5	4.55703	19.4122	2.0908	8.67023e-09	1.63662e-07
ANXA6	70.7691	17.1542	-2.04456	6.30572e-08	7.3808e-07
ALB	0.0185689	2.999	7.33544	0.0280658	0.0458909
OAS1	12.7812	28.4362	1.1537	0.00103782	0.00269034
ACTA1	2.10305	0.579222	-1.86029	0.00129845	0.00324881
CCL14	2.20281	0.260473	-3.08014	6.83874e-12	3.05512e-09
CCL19	44.3653	13.4284	-1.72414	0.00134149	0.00334318
CCR3	0.0435011	0.411247	3.24088	1.25647e-06	8.54408e-06
CCL2	92.565	12.4597	-2.8932	1.52388e-06	1.00785e-05
CCL21	31.2784	14.5868	-1.1005	0.000247122	0.00077709
CCL23	1.66233	0.649967	-1.35477	1.80858e-06	1.16174e-05
CXCR4	47.4861	19.6473	-1.27317	0.00211328	0.00492871
FAM19A3	0.0287697	0.287981	3.32336	6.84722e-07	5.1534e-06
MIF	26.5983	62.341	1.22885	2.2724e-07	2.0748e-06
OLR1	1.29026	9.22849	2.83843	0.0049622	0.010263
RNASE2	0.42982	1.17824	1.45483	0.0165263	0.0289963
CD79B	11.0467	4.21469	-1.39012	7.89658e-05	0.000289722
VAV2	5.51469	12.2381	1.15003	1.97129e-05	8.81279e-05
RAC3	1.48563	10.794	2.86109	3.70442e-11	5.36014e-09
NFATC1	3.53672	1.33791	-1.40243	6.78422e-07	5.11009e-06
NFATC2	4.27828	1.6595	-1.36628	1.1937e-05	5.72971e-05
NFATC4	8.38622	3.2333	-1.37501	4.89992e-08	6.0485e-07
FOS	917.618	120.901	-2.92407	2.24475e-10	1.52495e-08
AKT3	7.58419	2.56405	-1.56457	4.41986e-06	2.46522e-05
PRKCB	3.71747	0.943157	-1.97875	5.67423e-10	2.63529e-08
C3	111.337	40.2895	-1.46645	7.14403e-06	3.71003e-05
CKLF	4.58942	10.4163	1.18246	1.80978e-08	2.81566e-07
CMA1	6.70368	0.853566	-2.97338	5.79772e-09	1.2342e-07
CX3CL1	17.561	7.33716	-1.25908	1.89557e-07	1.79176e-06
CYR61	459.513	68.6652	-2.74246	3.75166e-11	5.36014e-09
FGF10	2.16573	0.183738	-3.55913	4.03341e-12	2.64326e-09
SEMA3A	2.55272	0.88439	-1.52928	2.1799e-05	9.60128e-05
SEMA3E	2.50087	0.539871	-2.21175	2.71391e-09	7.07394e-08
SEMA3G	4.67634	1.56342	-1.58067	2.56334e-09	6.79322e-08
SEMA4F	0.923354	2.44596	1.40544	4.95188e-08	6.10461e-07
SLIT2	4.27098	0.733172	-2.54234	7.11087e-10	3.0323e-08
TYMP	15.8677	52.4722	1.72546	0.000159988	0.000533569
CX3CR1	0.572772	0.273092	-1.06857	0.00137691	0.00342094
EDNRA	9.71347	2.79266	-1.79835	9.40502e-07	6.67674e-06
EDNRB	8.40131	2.4928	-1.75284	6.93962e-09	1.40009e-07
PLXNA1	4.81546	13.9252	1.53195	4.91727e-10	2.41526e-08
PLXNA3	2.71895	6.1623	1.18042	1.07074e-07	1.1344e-06
ADM2	0.288973	1.49382	2.37	7.54367e-07	5.5769e-06
AMH	0.193132	1.65467	3.09889	3.55918e-06	2.04411e-05
ANGPTL7	1.97155	0.157995	-3.64138	1.1364e-10	1.01535e-08
APLN	0.567586	3.0767	2.43847	4.00317e-06	2.26923e-05
AREG	72.7297	26.1791	-1.47413	0.00242468	0.00555215
ARTN	0.846212	2.37614	1.48953	0.00101057	0.00263133
BDNF	0.85604	0.249823	-1.77677	6.86255e-09	1.38603e-07
BMP5	5.98414	0.616628	-3.27867	4.73499e-09	1.0621e-07
BMP8A	0.157455	0.436922	1.47244	8.97061e-06	4.47886e-05
BMP8B	0.805522	2.82586	1.81069	1.20401e-05	5.77181e-05
CGB5	0.0127614	3.6932	8.17694	0.000129975	0.000445266
CGB7	0.169975	0.410643	1.27257	0.00259544	0.00588404
CGB8	0.00654159	1.13118	7.43397	0.000279859	0.000864787
CMTM1	0.240076	0.646934	1.43013	1.22717e-06	8.36678e-06
CMTM4	2.34371	4.72164	1.01049	0.000655471	0.00180835
CMTM8	3.33112	7.32276	1.13638	0.000377015	0.00112036
CORT	0.152433	0.367285	1.26873	3.91389e-05	0.000158439
CSF2	0.216354	1.5632	2.85304	0.00137411	0.0034167
CSF3	35.1936	3.42146	-3.36263	3.79998e-06	2.1678e-05
CSPG5	0.138633	0.430068	1.63329	0.00242468	0.00555215
CTGF	424.04	63.9882	-2.72832	2.44834e-09	6.61935e-08
DKK1	54.6465	17.3353	-1.65642	0.00859855	0.0165285
ESM1	0.25948	5.96558	4.52296	5.68623e-12	2.73566e-09
FGF11	0.0649339	0.304383	2.22884	1.50388e-05	6.99158e-05
FGF7	7.99174	1.63953	-2.28523	1.79345e-09	5.33292e-08
FGF8	0.0246075	0.782695	4.99128	0.0127493	0.0232181
GAL	0.170267	3.36057	4.30283	0.0031027	0.00685861
GAST	0.0198679	0.30823	3.9555	0.00356273	0.0077267
GDNF	0.41352	0.195128	-1.08354	0.00202182	0.0047475
GKN1	2.48788	1.20419	-1.04686	0.0308091	0.0497522
GNRH2	0.140511	0.332827	1.24409	0.016525	0.0289963
GREM2	3.17354	0.412038	-2.94524	2.62081e-11	4.81671e-09
GRP	0.354986	1.02198	1.52554	0.00473089	0.00984207
GUCA2A	0.128049	8.67117	6.08146	0.000682723	0.00187527
HBEGF	74.4291	11.5684	-2.68568	1.47853e-05	6.88377e-05
HDGF	59.3717	118.875	1.0016	1.67705e-08	2.6554e-07
IGF1	0.598313	0.261809	-1.19239	4.28788e-07	3.53769e-06
IL16	2.05561	0.866757	-1.24586	8.71233e-07	6.2704e-06
IL17B	0.665661	0.229467	-1.5365	0.000255262	0.000798006
IL33	15.5067	6.18562	-1.32591	2.55807e-08	3.65832e-07
IL34	4.66598	2.16429	-1.10829	5.28619e-06	2.87576e-05
IL6ST	24.4684	9.20824	-1.40992	1.02367e-08	1.83977e-07
INHA	0.202189	1.03159	2.35109	5.19019e-05	0.000201546
INHBA	0.899492	5.74905	2.67614	0.000268653	0.00083442
LHB	0.212574	0.880929	2.05106	1.0063e-07	1.08104e-06
LIF	16.1223	5.71626	-1.49592	0.0015471	0.00377972
LTBP4	51.4524	10.1258	-2.3452	3.22165e-11	5.03732e-09
MDK	52.579	159.915	1.60475	1.1937e-05	5.72971e-05
NAMPT	37.2041	16.9176	-1.13693	0.00791349	0.0153882
NGF	2.17308	0.987511	-1.13787	6.09744e-07	4.67444e-06
NMB	5.77189	17.34	1.58699	3.15942e-07	2.74446e-06
NRG2	1.38667	0.415638	-1.73823	8.38617e-09	1.60071e-07
NTF3	1.452	0.303481	-2.25837	2.03477e-10	1.44169e-08
OGN	23.3234	1.19661	-4.28475	2.5815e-11	4.81671e-09
PDGFD	7.68745	2.27663	-1.7556	2.16102e-07	1.98859e-06
PGF	1.52238	4.48366	1.55834	0.000570944	0.00160273
PPY	0.0153896	0.635546	5.36797	0.0236318	0.0395049
PROK1	0.590467	0.260078	-1.18291	0.000136311	0.000464513
QRFP	0.910165	0.349868	-1.37932	1.2749e-07	1.29864e-06
RLN1	0.0662806	0.31066	2.22868	0.0017096	0.00412515
RLN2	0.102174	0.517477	2.34046	0.00039853	0.00117536
SPP1	6.17913	145.402	4.5565	3.41614e-08	4.57183e-07
STC1	26.3976	8.59063	-1.61957	0.000815257	0.00219024
TAC1	1.50656	0.715312	-1.07462	8.06414e-07	5.87493e-06
TGFA	4.52871	9.14714	1.01422	0.0063554	0.012721
TGFB3	10.577	4.67757	-1.1771	2.23187e-06	1.38527e-05
TNFSF12	20.943	9.14435	-1.19552	1.19888e-07	1.23326e-06
TNFSF8	0.888261	0.44113	-1.00978	7.53353e-05	0.00027848
TOR2A	2.39568	4.96045	1.05004	7.6887e-08	8.64368e-07
TSLP	1.75924	0.440059	-1.99918	3.34401e-08	4.49453e-07
UCN	0.59998	1.24509	1.05327	0.0100205	0.0188317
UCN2	0.408786	2.51595	2.62168	7.53092e-06	3.87556e-05
VGF	0.129767	1.33502	3.36286	3.38656e-07	2.90545e-06
ACVR2B	0.614396	1.35999	1.14636	0.000276592	0.000855822
ADRB2	2.85848	1.36482	-1.06654	1.50392e-05	6.99158e-05
AGTR1	3.89031	0.457221	-3.08892	1.37116e-10	1.14196e-08
ANGPTL1	7.1428	1.09483	-2.70579	5.01257e-09	1.11174e-07
ANGPTL2	31.9755	13.0409	-1.29393	3.03765e-05	0.000127335
AR	3.06519	1.45733	-1.07265	5.1466e-06	2.81123e-05
AVPR2	1.01274	0.342929	-1.56228	5.05722e-08	6.20617e-07
ESR1	2.4269	0.408273	-2.57151	1.39775e-07	1.40321e-06
FGFR1	13.6027	3.81991	-1.83228	1.12571e-09	3.94799e-08
GALR2	0.17321	0.789809	2.18898	0.0113716	0.0210274
GHR	1.8465	0.41604	-2.15	6.31543e-10	2.80133e-08
GLP2R	4.26446	0.148691	-4.84197	1.19414e-10	1.04699e-08
IL11RA	4.25583	2.06376	-1.04417	4.12583e-07	3.42081e-06
IL17RB	0.790273	2.10703	1.41479	0.00166043	0.00401788
IL17RD	2.32735	1.01887	-1.19172	0.00367141	0.00792689
IL17RE	2.06362	4.60263	1.15728	0.00195932	0.00462016
IL1RAP	0.981721	2.32872	1.24615	0.0168709	0.0294958
IL22RA1	0.94326	2.56265	1.44191	1.95139e-06	1.23738e-05
IL6R	4.08572	1.93937	-1.075	2.82045e-05	0.000119485
LEPR	2.58899	0.679322	-1.93022	3.99869e-09	9.40194e-08
LGR6	2.37024	1.01532	-1.2231	4.30215e-06	2.41398e-05
LIFR	4.76342	1.33883	-1.83103	2.64195e-08	3.7412e-07
NPR1	5.32862	1.63752	-1.70225	9.16455e-09	1.7127e-07
NR2F1	11.6356	3.71999	-1.64517	5.7369e-09	1.22878e-07
NR3C2	4.64515	0.644224	-2.85009	1.86931e-10	1.38086e-08
NR4A1	151.426	12.1059	-3.64483	2.33407e-12	2.11941e-09
NR4A2	32.5401	4.73251	-2.78154	1.69493e-10	1.29815e-08
NR4A3	22.9383	1.83048	-3.64746	5.46579e-12	2.69881e-09
NRP2	8.30728	3.16951	-1.39012	0.00058294	0.00163201
OXTR	0.191856	0.939659	2.29211	1.82746e-05	8.25634e-05
PTGER3	1.62397	0.451064	-1.84812	3.40134e-06	1.96852e-05
PTGER4	9.72909	4.82985	-1.01033	0.00015063	0.000506318
PTGFR	4.55201	0.489873	-3.21602	8.78576e-10	3.34765e-08
PTH1R	2.14844	0.452853	-2.24618	2.9471e-11	4.93093e-09
RORA	1.19717	0.566056	-1.08061	1.66176e-07	1.61052e-06
S1PR1	14.4835	4.48376	-1.69163	1.82955e-08	2.83233e-07
SDC2	29.7522	10.2465	-1.53787	4.20778e-07	3.47647e-06
SDC3	23.9278	11.9371	-1.00324	0.000159988	0.000533569
SSTR1	0.950985	0.227161	-2.06571	1.60059e-10	1.26185e-08
TACR1	1.08437	0.239757	-2.17721	1.4988e-10	1.20726e-08
TEK	2.73757	1.20973	-1.17822	1.59696e-06	1.04952e-05
TGFBR2	41.414	18.2216	-1.18447	5.111e-08	6.25964e-07
TGFBR3	19.0421	5.04596	-1.91599	4.32852e-09	9.92861e-08
THRA	11.1196	4.15526	-1.42009	1.2749e-07	1.29864e-06
TNFRSF25	2.39076	5.67373	1.24683	3.3401e-06	1.94326e-05
TUBB3	0.284046	1.64111	2.53048	2.94007e-06	1.74903e-05
FCGR3A	4.59462	19.5906	2.09214	0.00782594	0.0152417
NCR3	1.33607	0.386429	-1.78972	0.0201649	0.034446
SH3BP2	2.25857	4.93213	1.1268	1.12725e-07	1.17962e-06
FYN	9.53601	4.18648	-1.18765	2.44984e-05	0.00010633
BID	5.61025	14.2301	1.34281	8.49032e-10	3.31883e-08
GRAP2	0.692545	0.329119	-1.0733	1.47853e-05	6.88377e-05
MAP3K8	13.728	6.07103	-1.17711	2.38945e-05	0.000104094
TRBV3-1	0.714804	0.355297	-1.00852	0.0179424	0.0311168
TRBV24-1	0.68333	0.205883	-1.73076	0.0266682	0.0438964
